# Supplementary material
Source: PubMed Central journal article supplement (PMC5817624)
Supplement: ja7b12240_si_001.pdf [file ja7b12240_si_001.pdf]

## Supporting Information

### Tundrenone: An Atypical Secondary Metabolite from Bacteria with Highly Restricted Primary Metabolism

Aaron W. Puri,<sup>a,‡</sup> Emily Mevers,<sup>b,‡</sup> Timothy R. Ramadhar,<sup>b,‡</sup> Daniel Petras,<sup>c</sup> Darren Liu,<sup>a</sup> Jörn Piel,<sup>d</sup> Pieter C. Dorrestein,<sup>c</sup> E. Peter Greenberg,<sup>e</sup> Mary E. Lidstrom,<sup>a,e</sup> and Jon Clardy<sup>b,\*</sup>

<sup>a</sup> *Department of Chemical Engineering, University of Washington, Seattle, Washington 98195, United States of America*

<sup>b</sup> *Department of Biological Chemistry and Molecular Pharmacology, Harvard Medical School, 240 Longwood Avenue, Boston, Massachusetts, 02115, United States of America*

<sup>c</sup> *Collaborative Mass Spectrometry Innovation Center, Skaggs School of Pharmacy and Pharmaceutical Sciences, University of California, San Diego, La Jolla, California 92093, United States of America*

<sup>d</sup> *Institute of Microbiology, Eidgenössische Technische Hochschule (ETH) Zürich, Vladimir-Prelog-Weg 4, 8093 Zürich, Switzerland*

<sup>e</sup> *Department of Microbiology, University of Washington, Seattle, Washington 98195, United States of America*

‡ - Equal First Authorship

E-mail: jon\_clardy@hms.harvard.edu

## Table of Contents

|                                                                                                                    |     |
|--------------------------------------------------------------------------------------------------------------------|-----|
| <b>Experimental Procedures</b> .....                                                                               | S3  |
| <i>General procedures</i> .....                                                                                    | S3  |
| <i>High Resolution LC-MS/MS</i> .....                                                                              | S3  |
| <i>MS/MS dataset deposition</i> .....                                                                              | S4  |
| <i>Source of microbial strains</i> .....                                                                           | S4  |
| <i>Strain growth and genetic manipulation</i> .....                                                                | S4  |
| <i>Extraction and purification of tundrenone (1)</i> .....                                                         | S5  |
| <i>LC-MS analysis of mutant strains</i> .....                                                                      | S6  |
| <i>Quantification of tundrenone and the acyl-homoserine lactone 3-OH-C<sub>10</sub>-HSL</i> .....                  | S6  |
| <i>Computational procedures</i> .....                                                                              | S7  |
| <b>Additional Experimental Tables and Figures</b> .....                                                            | S9  |
| <b>Table S1.</b> NMR assignments for tundrenone (1) in <i>d</i> <sub>6</sub> -DMSO .....                           | S9  |
| <b>Figure S1.</b> <sup>1</sup> H NMR spectrum of tundrenone (1) in <i>d</i> <sub>6</sub> -DMSO (600 MHz) .....     | S10 |
| <b>Figure S2.</b> <sup>13</sup> C NMR spectrum of tundrenone (1) in <i>d</i> <sub>6</sub> -DMSO (125 MHz) .....    | S10 |
| <b>Figure S3.</b> gHSQC spectrum of tundrenone (1) in <i>d</i> <sub>6</sub> -DMSO ( <sup>1</sup> H – 600 MHz)..... | S11 |
| <b>Figure S4.</b> dqfCOSY spectrum of tundrenone (1) in <i>d</i> <sub>6</sub> -DMSO (600 MHz) .....                | S11 |

|                                                                                                                               |     |
|-------------------------------------------------------------------------------------------------------------------------------|-----|
| <b>Figure S5.</b> gHMBCAD spectrum of tundrenone ( <b>1</b> ) in <i>d</i> <sub>6</sub> -DMSO ( <sup>1</sup> H – 600 MHz)..... | S12 |
| <b>Figure S6.</b> ROESY spectrum of tundrenone ( <b>1</b> ) in <i>d</i> <sub>6</sub> -DMSO (500 MHz) .....                    | S12 |
| <b>Figure S7.</b> High resolution MS1 and MS2 spectra of tundrenone ( <b>1</b> ).....                                         | S13 |
| <b>Figure S8.</b> CD spectrum of tundrenone ( <b>1</b> ) – 1.27 mg/mL in MeOH.....                                            | S14 |
| <b>Figure S9.</b> Acyl-CoA ligase mutant ( <i>ΔtunJ</i> ) produces the quorum sensing signal 3-OH-C <sub>10</sub> -HSL.S14    |     |
| <b>Figure S10.</b> Extracted ion chromatogram of the bicyclic ring. ....                                                      | S15 |
| <b>Figure S11.</b> Extracted ion chromatogram of an ion corresponding to the modified lipid tail.....                         | S16 |
| <b>Table S2.</b> Primers used in this study. ....                                                                             | S17 |
| <b>Computational Data</b> .....                                                                                               | S18 |
| <b>Table S3.</b> Atom numbers equivalences from manuscript to supporting information.....                                     | S18 |
| <b>Figure S12.</b> Atom numbering for computational data .....                                                                | S18 |
| <b>Table S4.</b> Coordinates of lowest energy structure of <b>i</b> (gas phase, molecular mechanics) .....                    | S19 |
| <b>Table S5.</b> Coordinates of lowest energy structure of <b>ii</b> (gas phase, molecular mechanics) .....                   | S20 |
| <b>Table S6.</b> Coordinates of lowest energy structure of <b>iii</b> (gas phase, molecular mechanics) .....                  | S21 |
| <b>Table S7.</b> Coordinates of lowest energy structure of <b>iv</b> (gas phase, molecular mechanics) .....                   | S22 |
| <b>Table S8.</b> Coordinates of <b>i-1</b> (gas phase, B3LYP/6-31+G(d,p)).....                                                | S23 |
| <b>Table S9.</b> NMR isotropic and chemical shifts for <b>i-1</b> .....                                                       | S24 |
| <b>Table S10.</b> Coordinates of <b>i-2</b> (gas phase, B3LYP/6-31+G(d,p)).....                                               | S25 |
| <b>Table S11.</b> NMR isotropic and chemical shifts for <b>i-2</b> .....                                                      | S26 |
| <b>Table S12.</b> Coordinates of <b>i-4</b> (gas phase, B3LYP/6-31+G(d,p)).....                                               | S27 |
| <b>Table S13.</b> NMR isotropic and scaled chemical shifts for <b>i-4</b> .....                                               | S28 |
| <b>Table S14.</b> Coordinates of <b>i-5</b> (gas phase, B3LYP/6-31+G(d,p)).....                                               | S29 |
| <b>Table S15.</b> NMR isotropic and chemical shifts for <b>i-5</b> .....                                                      | S30 |
| <b>Table S16.</b> Coordinates of <b>i-6</b> (gas phase, B3LYP/6-31+G(d,p)).....                                               | S31 |
| <b>Table S17.</b> NMR isotropic and chemical shifts for <b>i-6</b> .....                                                      | S32 |
| <b>Table S18.</b> Coordinates of <b>iii-2</b> (gas phase, B3LYP/6-31+G(d,p)).....                                             | S33 |
| <b>Table S19.</b> NMR isotropic and chemical shifts for <b>iii-2</b> .....                                                    | S34 |
| <b>Table S20.</b> Coordinates of <b>iii-3</b> (gas phase, B3LYP/6-31+G(d,p)).....                                             | S35 |
| <b>Table S21.</b> NMR isotropic and chemical shifts for <b>iii-3</b> .....                                                    | S36 |
| <b>Table S22.</b> Coordinates of <b>iii-4</b> (gas phase, B3LYP/6-31+G(d,p)).....                                             | S37 |
| <b>Table S23.</b> NMR isotropic and chemical shifts for <b>iii-4</b> .....                                                    | S38 |
| <b>Table S24.</b> Coordinates of <b>iii-6</b> (gas phase, B3LYP/6-31+G(d,p)).....                                             | S39 |
| <b>Table S25.</b> NMR isotropic and chemical shifts for <b>iii-6</b> .....                                                    | S40 |
| <b>Table S26.</b> Coordinates of <b>iii-7</b> (gas phase, B3LYP/6-31+G(d,p)).....                                             | S41 |
| <b>Table S27.</b> NMR isotropic and chemical shifts for <b>iii-7</b> .....                                                    | S42 |
| <b>Table S28.</b> Coordinates of <b>iii-10</b> (gas phase, B3LYP/6-31+G(d,p)).....                                            | S43 |
| <b>Table S29.</b> NMR isotropic and chemical shifts for <b>iii-10</b> .....                                                   | S44 |
| <b>Table S30.</b> Coordinates of <b>iii-11</b> (gas phase, B3LYP/6-31+G(d,p)).....                                            | S45 |
| <b>Table S31.</b> NMR isotropic and chemical shifts for <b>iii-11</b> .....                                                   | S46 |
| <b>Table S32.</b> Coordinates of <b>i-1</b> (wB97XD/6-311++G(d,p), SCRf = CPCM, solvent = MeOH) .....                         | S47 |
| <b>Table S33.</b> Coordinates of <b>i-2</b> (wB97XD/6-311++G(d,p), SCRf = CPCM, solvent = MeOH) .....                         | S48 |
| <b>Table S34.</b> Coordinates of <b>i-4</b> (wB97XD/6-311++G(d,p), SCRf = CPCM, solvent = MeOH) .....                         | S49 |
| <b>Table S35.</b> Coordinates of <b>i-5</b> (wB97XD/6-311++G(d,p), SCRf = CPCM, solvent = MeOH) .....                         | S50 |
| <b>Table S36.</b> Coordinates of <b>i-6</b> (wB97XD/6-311++G(d,p), SCRf = CPCM, solvent = MeOH) .....                         | S51 |
| <b>References</b> .....                                                                                                       | S52 |

## Experimental Procedures

### *General procedures*

Optical rotation data was measured on a JASCO P-2000 polarimeter, circular dichroism spectra on a JASCO J-815 spectropolarimeter, and UV spectra on an Amersham Biosciences Ultrospec 5300-pro UV/Visible spectrophotometer. NMR data were acquired for a ~3 mg sample of **1** dissolved in 35  $\mu$ L DMSO- $d_6$  on either a 500 MHz Varian VNMRS (Varian NMR System), 500 MHz spectrometer equipped with an inverse cold probe (500 and 125 MHz for  $^1\text{H}$  and  $^{13}\text{C}$  NMR, respectively), Bruker AVANCE II 600 MHz spectrometer equipped with a  $^1\text{H}\{^{13}\text{C}/^{15}\text{N}\}$  cryoprobe, or Bruker AVANCE 500 MHz spectrometer equipped with a broadband cryoprobe with DMSO as an internal standard ( $\delta_{\text{C}}$  39.52,  $\delta_{\text{H}}$  2.50). Routine LR-LCMS data were obtained using an Agilent 1200 series HPLC system equipped with a photo-diode array detector and a 6130-quadrupole mass spectrometer. HPLC purifications were carried out using Agilent 1100 or 1200 series HPLC systems equipped with a photo-diode array detector, or a Varian ProStar 210 with UV detector. All solvents were of HPLC quality.

### *High Resolution LC-MS/MS*

LC-MS/MS experiments were performed on a Vanquish ultra-high performance liquid chromatography (UHPLC) system coupled to a Q-Exactive mass spectrometer (Thermo Fisher Scientific, Bremen, Germany). A C18 core-shell column (Kinetex, 50 x 2 mm, 1.8  $\mu$ m particle size, 100  $\text{\AA}$  pore size, Phenomenex, Torrance, USA) was used for reversed phase separation. A flowrate of 0.5 mL/min was used. Solvent A: Water + 0.1 % formic acid, Solvent B: Acetonitrile + 0.1 % formic acid. Gradient: 0-0.5 min, 5% B. 0.5-4 min, 5-50% B. 4-5 min, 50-99% B. 5-7 min, 99% B. 7-9 min, 5% B. For MS and MS/MS measurements the electrospray ionization (ESI) parameters were set to 35 L/min sheath gas flow, 10 L/min auxiliary gas flow, 2 L/min sweep gas flow and 400  $^{\circ}\text{C}$  auxiliary gas temperature. The spray voltage was set to 3.5 kV, the inlet capillary was set to 250  $^{\circ}\text{C}$  and a 50 V S-lens radio frequency (RF) level was applied. MS/MS spectra were recorded in data dependent acquisition (DDA) mode. For MS1 survey scans (300-2000  $m/z$ ) and up to 5 MS/MS scans of the most abundant ions per duty cycle resolution (R) was set to 140,000 with 1 micro-scan in positive mode. For MS1 scans, internal

was calibration was used. The maximum ion injection time was set to 100 ms and a MS/MS precursor selection window was set to 1  $m/z$ . Normalized collision energy was set to 30 % with  $z = 1$  as default charge state. MS/MS experiments were automatically triggered at the apex of a peak within 2 to 15 s from their first occurrence. A dynamic exclusion was set to 5 s. Ion species with unassigned charge states as well as isotope peaks were excluded.

### *MS/MS dataset deposition*

To facilitate future compound dereplication, MS/MS spectra were annotated and included in the Global Natural Product Social Molecular Networking database (GNPS)<sup>1</sup> under MassIVE ID MSV000081637 (<https://massive.ucsd.edu/>).

### *Source of microbial strains*

*M. tundripaludum* 21/22 was originally isolated from lake sediment from Lake Washington (Seattle, WA, USA).<sup>2</sup> The acyl-homoserine lactone mutant  $\Delta mbal$  was constructed previously.<sup>3</sup>

### *Strain growth and genetic manipulation*

*M. tundripaludum* 21/22 was cultured in an atmosphere of 25% methane in air. Plates were incubated at room temperature in sealed jars (Oxoid Limited, Hampshire, United Kingdom), while liquid cultures were grown at 18°C in 250-ml glass serum bottles (Kimble Chase, Vineland, NJ, USA) or 18- by 150-mm tubes (Bellco Glass, Vineland, NJ, USA) sealed with rubber stoppers and aluminum seals (Wheaton, Millville, NJ, USA) shaken at 200 rpm. Cultures were grown in nitrate mineral salts (NMS) medium<sup>4</sup> containing 0.2 g/L  $MgSO_4 \cdot 7H_2O$ , 0.2 g/L  $CaCl_2 \cdot 6H_2O$ , 1 g/L  $KNO_3$ , and 30  $\mu M$   $LaCl_3$  as well as 1X trace elements. 500X trace elements contains 1.0 g/L  $Na_2$ -EDTA, 2.0 g/L  $FeSO_4 \cdot 7H_2O$ , 0.8 g/L  $ZnSO_4 \cdot 7H_2O$ , 0.03 g/L  $MnCl_2 \cdot 4H_2O$ , 0.03 g/L  $H_3BO_3$ , 0.2 g/L  $CoCl_2 \cdot 6H_2O$ , 0.6 g/L  $CuCl_2 \cdot 2H_2O$ , 0.02 g/L  $NiCl_2 \cdot 6H_2O$ , and 0.05 g/L  $Na_2MoO_4 \cdot 2H_2O$ . A final concentration of 5.8 mM phosphate buffer, pH 6.8 was added immediately before use.

Knock out plasmids for the predicted acyl-CoA ligase gene *tunJ* as well as the predicted anthranilate synthase genes *tunN* and *tunO* were constructed via Gibson assembly using the pCM433kanT backbone and introduced via conjugation using *E. coli* donor strain S17-1 as previously described.<sup>3,5</sup> Primers used for plasmid construction are listed in Table S2. Successful integrants (single crossovers) were selected on NMS plates containing kanamycin (50 µg/mL). Subsequent sucrose counterselection was performed as previously described.<sup>5</sup> *tunN* and *tunO* deletion strains could not be constructed despite multiple attempts.

### *Extraction and purification of tundrenone (1)*

Routinely a total of 2.2 liters of phosphate buffered NMS medium was divided into seven one-liter bottles (Kimble Chase, Vineland, NJ, USA) with gas tight caps with butyl septa (Wheaton, Millville, NJ, USA) and each inoculated with exponentially growing *M. tundripaludum* to an OD of 0.02. These cultures were grown at 20°C to stationary phase (approximately 48 hours). The culture was centrifuged (5000 rpm for 20 minutes) and the supernatant was extracted twice with an equal volume of ethyl acetate containing 0.01% (v/v) acetic acid. This extract was then dried *in vacuo*, and dissolved in 500 µL of MeOH. This was diluted to 25% MeOH in water and loaded onto a preequilibrated Discovery C<sub>18</sub> solid phase extraction column (3 mL, 500 mg) (Supelco, Bellefonte, PA, USA), which was washed and eluted with 6 mL of 25%, 50%, 75%, and 100% MeOH in water. The molecule was found in the 75% MeOH fraction by LCMS. This fraction was subsequently dried and resuspended in 200 µL of 50% MeOH in water and separated using a Nucleosil C<sub>18</sub> column (5 µm, 250 mm x 4.6 mm) (Supelco, Bellefonte, PA) at 0.75 mL/min using an isocratic run of 55% MeOH in water for 25 minutes. This process was repeated to get the quantities used in these studies.

**Tundrenone (1):** pale yellow oil;  $[\alpha]_D^{22}$  -66.4 (*c* 0.27, MeOH); UV (MeOH)  $\lambda_{\max}$  (log  $\epsilon$ ) 207.0 (3.62), 223.0 (3.42), 297.0 (3.84) nm; NMR (500 MHz, CD<sub>3</sub>OD) and <sup>13</sup>C NMR (125 MHz, CD<sub>3</sub>OD) see table S1; HRESIMS  $[M+H]^+$  421.1857 *m/z* (calcd for C<sub>22</sub>H<sub>29</sub>O<sub>8</sub> 421.1857, 0 ppm).

### *LC-MS analysis of mutant strains*

Concentrated extracts of supernatant from wildtype or mutant stationary phase cultures containing the equivalent of 1 mL of supernatant were analyzed by LC-MS using a Linear Trap Quadrupole Orbitrap Xcalibur 2.0 DS (Thermo Fisher Scientific) connected to an ACQUITY UPLC system (Waters). Samples were separated using an ACQUITY UPLC HSS T3 column (1.8  $\mu$ M, 2.1 mm x 100 mm; Waters) using a flow rate of 0.2 mL/min. Solvent A: Water containing 0.1 % formic acid. Solvent B: Acetonitrile containing 0.1% formic acid. Gradient: 0-1 min, 5% B. 1-8 min, 5- 95% B. 8-8.1 min, 95% B. 8.1-12 min, 5% B.

### *Quantification of tundrenone and the acyl-homoserine lactone 3-OH-C<sub>10</sub>-HSL*

The supernatant of centrifuged 50 mL stationary phase *M. tundripaludum* cultures was extracted twice with an equal volume of ethyl acetate containing 0.01% (v/v) acetic acid. For tundrenone quantification, the extract was then dried *in vacuo* and dissolved in 250  $\mu$ L of MeOH. This was diluted to 25% MeOH in water and loaded onto a preequilibrated Discovery C<sub>18</sub> solid phase extraction column (1 mL, 100 mg) (Supelco, Bellefonte, PA, USA), which was washed and eluted with 2 mL of 25%, 50%, and 75% MeOH in water. The 75% MeOH fraction, where tundrenone is the only UV-active compound as assessed by routine HPLC, was then dried under an N<sub>2</sub> (g) and resuspended in 500  $\mu$ L MeOH. The UV/vis spectrum was then recorded for dilutions of this semi-purified extract using a DU 640B spectrophotometer (Beckman, Brea, CA, USA), and the quantity of tundrenone was calculated using its extinction coefficient at 297 nm.

3-OH-C<sub>10</sub>-HSL was quantified using an *E. coli* reporter strain containing plasmids pAWP112 and pAWP113 as previously described.<sup>2</sup> Dilutions of extracts were dried under an N<sub>2</sub> stream and resuspended in 500  $\mu$ L of an overnight culture of the reporter strain subdiluted to an OD of 0.1 in LB containing kanamycin (50  $\mu$ g/mL) and chloramphenicol (35  $\mu$ g/mL). Cultures were shaken at 37C for 4 hours and then pelleted and resuspended in 500  $\mu$ L of 50 mM Tris pH 7.5. 100  $\mu$ L was measured for GFP fluorescence (485 nm excitation, 510 nm emission) in a 96-well plate (Nunc black optical bottom) by plate reader (Tecan Infinite F500) and compared to a standard curve of commercially available 3-OH-C<sub>10</sub>-HSL (Cayman Chemical, Ann Arbor, MI, USA).

## Computational procedures

Conformational searches for **i–iv** were performed in *Schrödinger Release 2016-1* using *MacroModel*.<sup>6</sup> Conformational searches were performed using the mixed torsional / low-mode sampling algorithm with extended torsion sampling and the OPLS3<sup>7</sup> molecular mechanics force field for gas-phase minimization and energy calculation. The default energy window (5 kcal/mol) was used for the search with the default root mean square deviation (RMSD) cutoff of 0.5 Å to eliminate redundant conformers. The  $^3J_{\text{HH}}$  coupling constants were calculated using the  $^1\text{H}$  NMR coupling measurement tool within *Maestro* (version 10.5.014) in *Schrödinger Release 2016-1*.

All subsequent quantum-chemical DFT calculations were performed in *Gaussian 09, Revision D.01*.<sup>8</sup> For calculation of the  $^{13}\text{C}$  NMR chemical shifts, all generated conformers for **i** and **iii** were subjected to gas-phase geometry optimization calculations at the B3LYP/6-31+G(d,p) level of theory.<sup>9</sup> Frequency calculations were performed at the same level of theory to ensure that all structures are minima on the potential energy hypersurface (i.e., no first or higher order saddle points). Structurally redundant conformers or those that have a  $G$  greater than 2.5 kcal/mol of the global minimum structure were rejected from further analysis. The global minimum structure and conformers with a  $G$  value within 2.5 kcal/mol of the global minimum were subjected to NMR calculations using a procedure by Tantillo and co-workers.<sup>10</sup> NMR properties were calculated using the gauge-independent atomic orbital (GIAO)<sup>11</sup> method at the mPW1PW91/6-311+G(2d,p) level of theory.<sup>12</sup> The self-consistent reaction field (SCRF) was invoked for solvation with the default integral equation formalism polarizable continuum model (IEFPCM)<sup>13</sup> and using DMSO as the solvent. The calculated isotropic chemical shifts were scaled according to the procedure by Tantillo and co-workers using scaling factors reported by Pierens ( $^1\text{H}$ : slope = -1.0580, intercept = 31.7217 |  $^{13}\text{C}$ : slope = -1.0496, intercept = 186.2534).<sup>10,14</sup> Finally, the scaled chemical shifts for conformers of **i** and **iii** were subjected to Boltzmann weighting at a temperature of 298.15 K using the calculated  $\Delta G$  values to afford the final calculated  $^{13}\text{C}$  chemical shifts. The corrected mean absolute deviation (CMAD) between theoretical and experimental values were calculated for **i** ( $^{13}\text{C}$ : 1.6 ppm,  $^1\text{H}$ : 0.20 ppm) and **iii** ( $^{13}\text{C}$ : 5.3 ppm,  $^1\text{H}$ : 0.24 ppm)

For calculation of the optical rotation of **i**, a procedure from Fuchter that we have used previously was employed.<sup>15,16</sup> The conformers for **i** optimized at the gas-phase B3LYP/6-

31+G(d,p) level of theory were reoptimized using a triple- $\zeta$  basis set at the wB97XD/6-311++G(d,p) level of theory<sup>17</sup> with SCRF invocation using the conductor-like polarizable continuum model (CPCM)<sup>18</sup> and MeOH as the solvent. Frequency calculations were performed to ensure the structures represent minima. Optical rotation calculations were performed at the same level of theory using the “polar=OptRot” directive and the sodium D-line wavelength (589.3 nm) was inputted using the “CPHF=RdFreq” directive. The optical rotation value for each conformer was subjected to Boltzmann weighting as stated above to afford the final optical rotation value.

All quantum-chemical calculations were performed on the Odyssey cluster maintained by FAS Research Computing at Harvard University. Each calculation utilized a maximum of 64 processing cores and 64 GB of RAM.

Cartesian coordinates for relevant structures / conformers are given through a two-part numbering system (e.g., **1-2**). The first number refers to compound number, and the second refers to the conformer number as obtained after a conformer search in *Schrödinger Release 2016-1*. Some conformers are not listed (e.g., **1-3**) because it is either redundant or has a *G* that is greater than 2.5 kcal/mol of the global minimum.



## Additional Experimental Tables and Figures

**Table S1.** NMR assignments for tundrenone (**1**) in  $d_6$ -DMSO

| Position | $\delta_C^c$ | $\delta_H$ ( $J$ in Hz) <sup>a</sup> | COSY <sup>a</sup> | HMBC <sup>a</sup> | ROESY <sup>b</sup> |
|----------|--------------|--------------------------------------|-------------------|-------------------|--------------------|
| 1        | 31.0         | 3.15 (ddd; 6.6, 3.5, 3.3)            | 2a, 2b, 9         | 4, 5, 9           | 2a, 9              |
| 2a       | 33.7         | 2.41 (dd; 18.0, 6.5)                 | 1, 2b             | 1, 3, 4, 5        | 1, 2b              |
| 2b       |              | 2.13 (dd; 17.9, 3.5)                 | 1, 2a             | 1, 3, 9           | 2a                 |
| 3        | 200.9        |                                      |                   |                   |                    |
| 4        | 147.5        |                                      |                   |                   |                    |
| 5        | 134.6        |                                      |                   |                   |                    |
| 6        | 121.7        | 6.79 (d; 9.9)                        | 7                 | 1, 4              | 7                  |
| 7        | 130.0        | 5.91 (dd; 9.8, 5.2)                  | 6, 8              | 5, 8, 9           | 6, 8               |
| 8        | 62.1         | 4.10 (dd; 5.1, 1.9)                  | 7                 | 1, 6, 7, 9        | 7, 22b             |
| 9        | 76.2         | 4.16 (bs)                            | 1                 | 1, 5, 7, 8        | 1, 22b             |
| 10       | 149.3        |                                      |                   |                   |                    |
| 11       | 161.5        |                                      |                   |                   |                    |
| 12       | 63.4         | 4.53 (m)                             |                   | 11, 13, 14, 21    |                    |
| 13       | 141.2        |                                      |                   |                   |                    |
| 14       | 77.8         | 4.53 (m)                             |                   | 12, 13, 15, 21    |                    |
| 15       | 209.9        |                                      |                   |                   |                    |
| 16       | 36.3         | 2.48 (t; 7.4)                        | 17                | 15, 17, 18        |                    |
| 17       | 22.3         | 1.42 (m)                             | 16, 18            | 15, 16, 18, 19    |                    |
| 18       | 30.5         | 1.17 (m)                             | 17                | 16, 19, 20        |                    |
| 19       | 21.7         | 1.23 (m)                             | 20                | 17, 18, 20        |                    |
| 20       | 13.6         | 0.84 (t; 7.4)                        | 19                | 18, 19            |                    |
| 21a      | 115.0        | 5.33 (bs)                            | 21b               | 12, 13, 14        | 21b                |
| 21b      |              | 5.19 (bs)                            | 21a               | 12, 13, 14        | 21a                |
| 22a      | 96.9         | 5.29 (d; 2.7)                        | 22b               | 10, 11            | 22b                |
| 22b      |              | 5.03 (d; 2.7)                        | 22a               | 10, 11            | 8, 9, 22a          |

<sup>a</sup> 600 MHz for <sup>1</sup>H NMR, dqfCOSY, gHSQC, and HMBC

<sup>b</sup> 500 MHz for ROESY

<sup>c</sup> 125 MHz for <sup>13</sup>C NMR

**Figure S1.**  $^1\text{H}$  NMR spectrum of tundrenone (**1**) in  $d_6$ -DMSO (600 MHz)

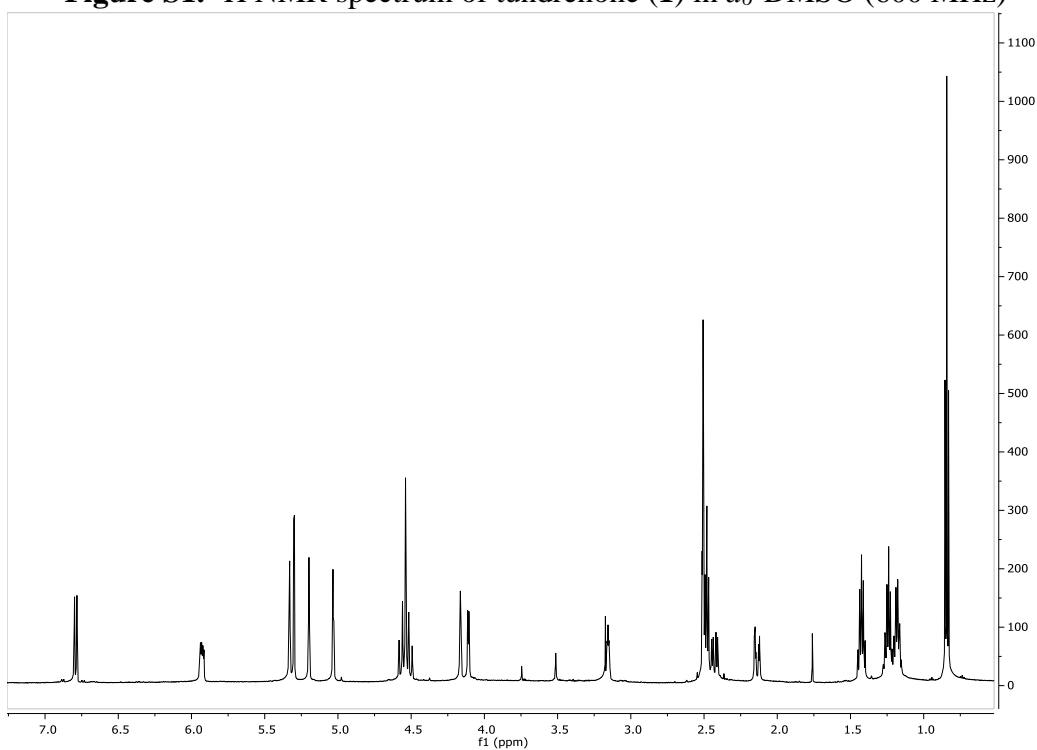

**Figure S2.**  $^{13}\text{C}$  NMR spectrum of tundrenone (**1**) in  $d_6$ -DMSO (125 MHz)

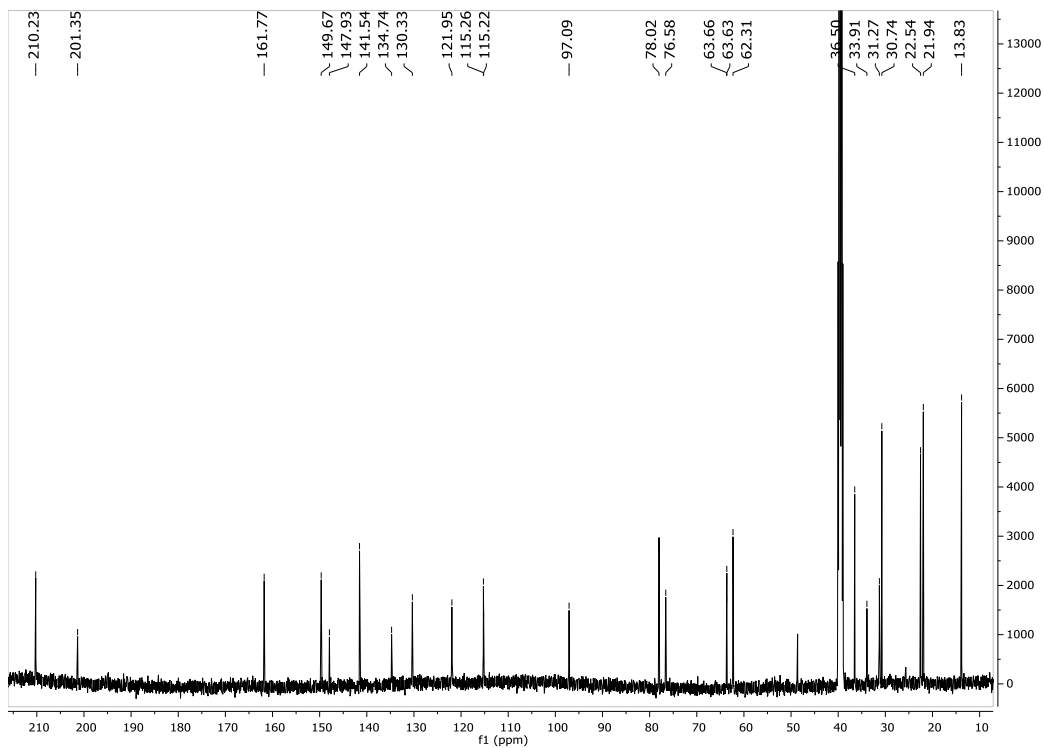

**Figure S3.** gHSQC spectrum of tundrenone (**1**) in  $d_6$ -DMSO ( $^1\text{H}$  – 600 MHz)

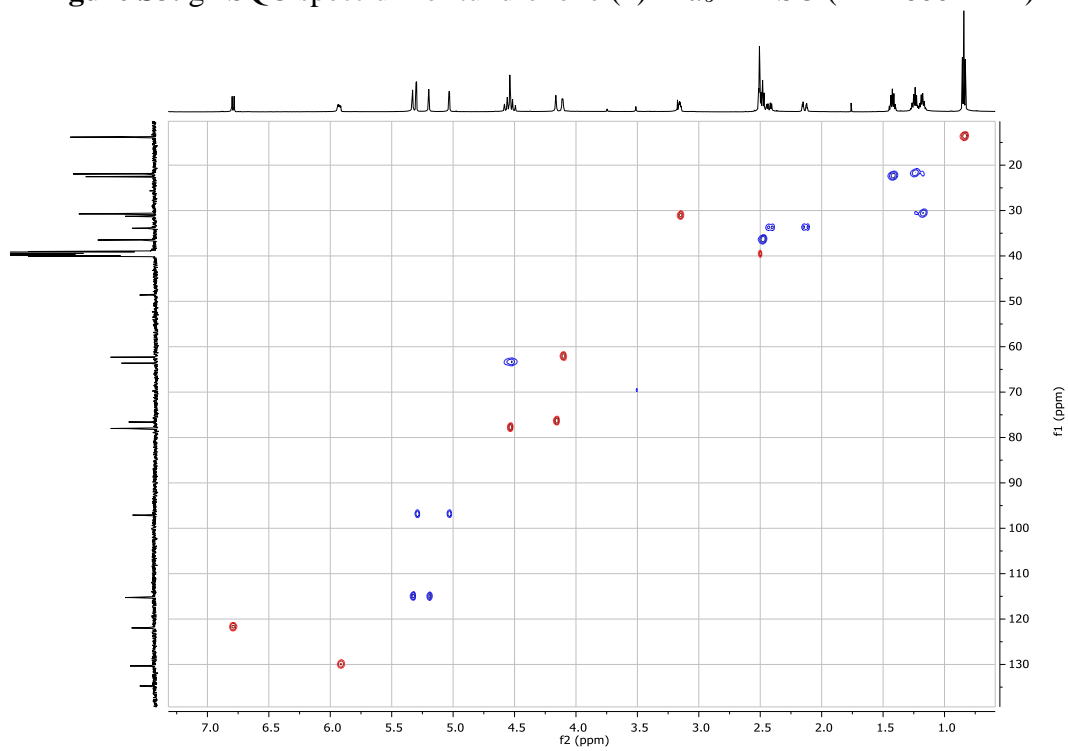

**Figure S4.** dqfCOSY spectrum of tundrenone (**1**) in  $d_6$ -DMSO (600 MHz)

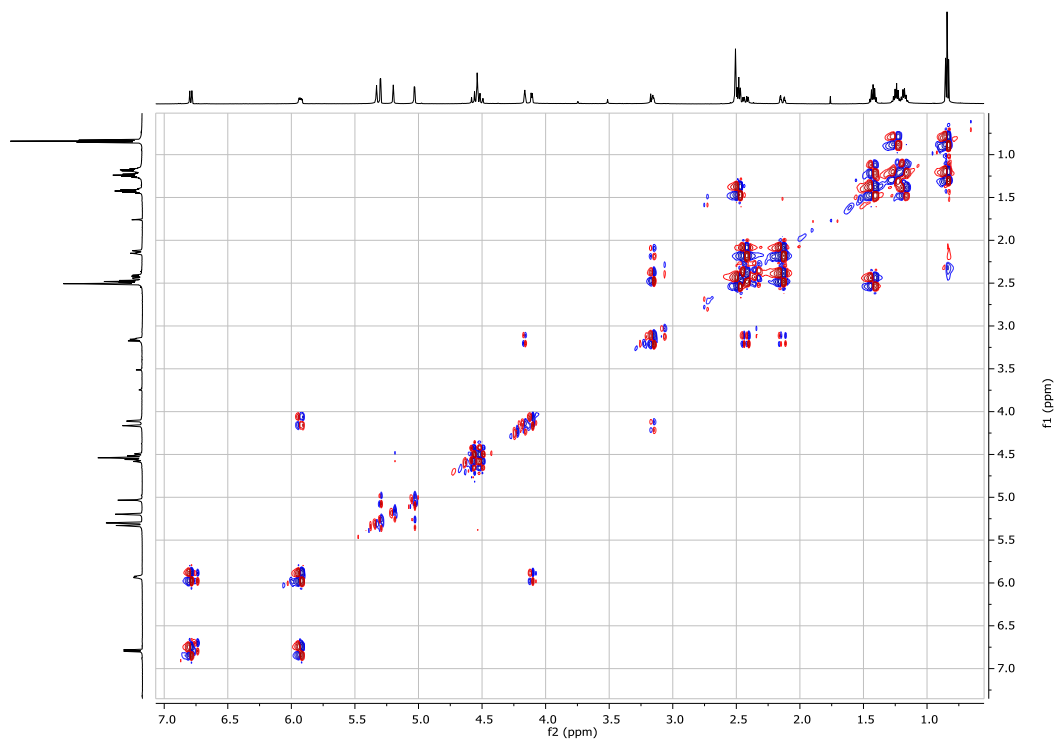

**Figure S5.** gHMBCAD spectrum of tundrenone (**1**) in  $d_6$ -DMSO ( $^1\text{H}$  – 600 MHz)

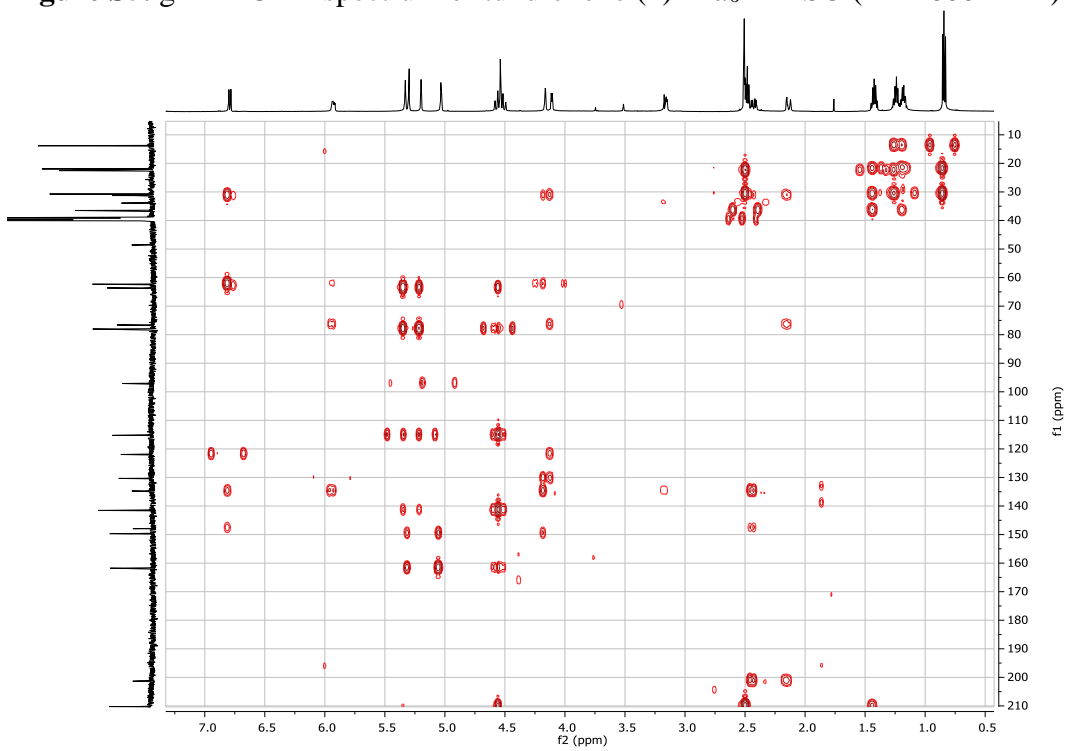

**Figure S6.** ROESY spectrum of tundrenone (**1**) in  $d_6$ -DMSO (500 MHz)

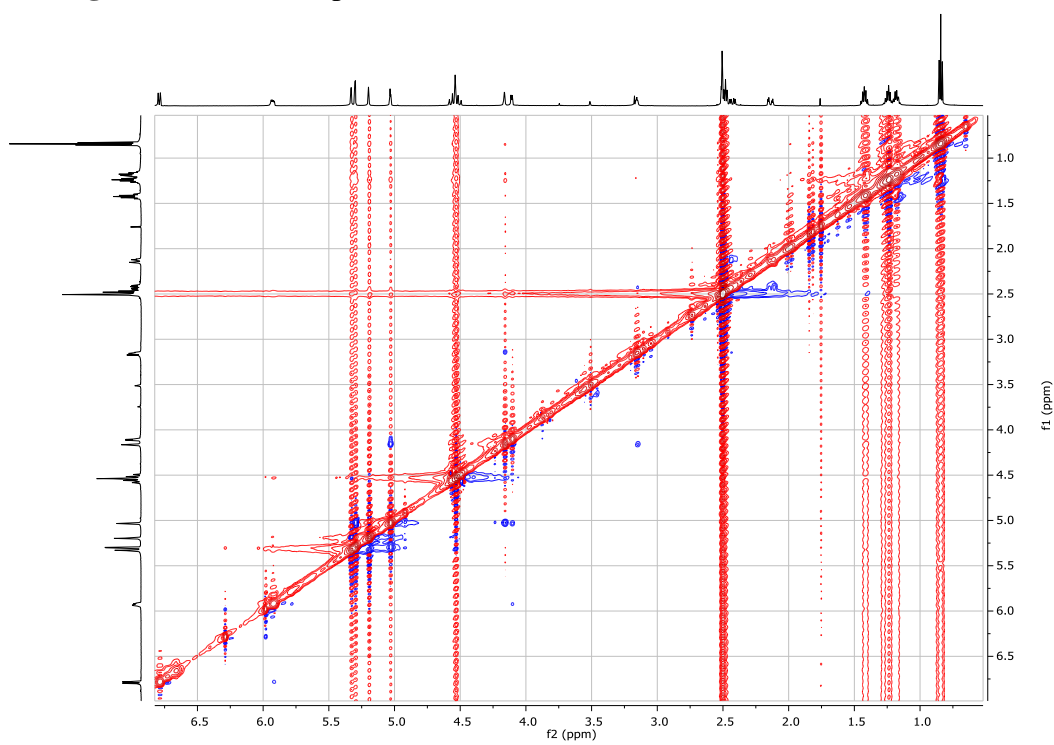

**Figure S7.** High resolution MS1 and MS2 spectra of tundrenone (**1**). MS1 (A, inset) and subsequent MS/MS scans of tundrenone  $[M+H]^+$  (B) and  $[M+Na]^+$  (C) ions are shown. The MS1 scan resulted in exact masses of  $m/z$  421.1857 ( $[M+H]^+$ ) and  $m/z$  443.1681 ( $[M+Na]^+$ ). These masses corresponded to calculated masses for tundrenone ions (421.1857 for  $C_{22}H_{29}O_8$  and 443.1676 for  $C_{22}H_{28}O_8Na$ ) with 0.00 and 1.13 ppm mass error, respectively. MS/MS fragment spectra of  $[M+H]^+$  shows the dehydrated lipid tail ( $m/z$  169.1221), while fragmentation of  $[M+Na]^+$  shows the bicyclic ring with attached dehydro-serine hydroxy acid ( $m/z$  275.0521) as well as the dehydro-serine hydroxy acid with attached lipid tail ( $m/z$  279.1200).

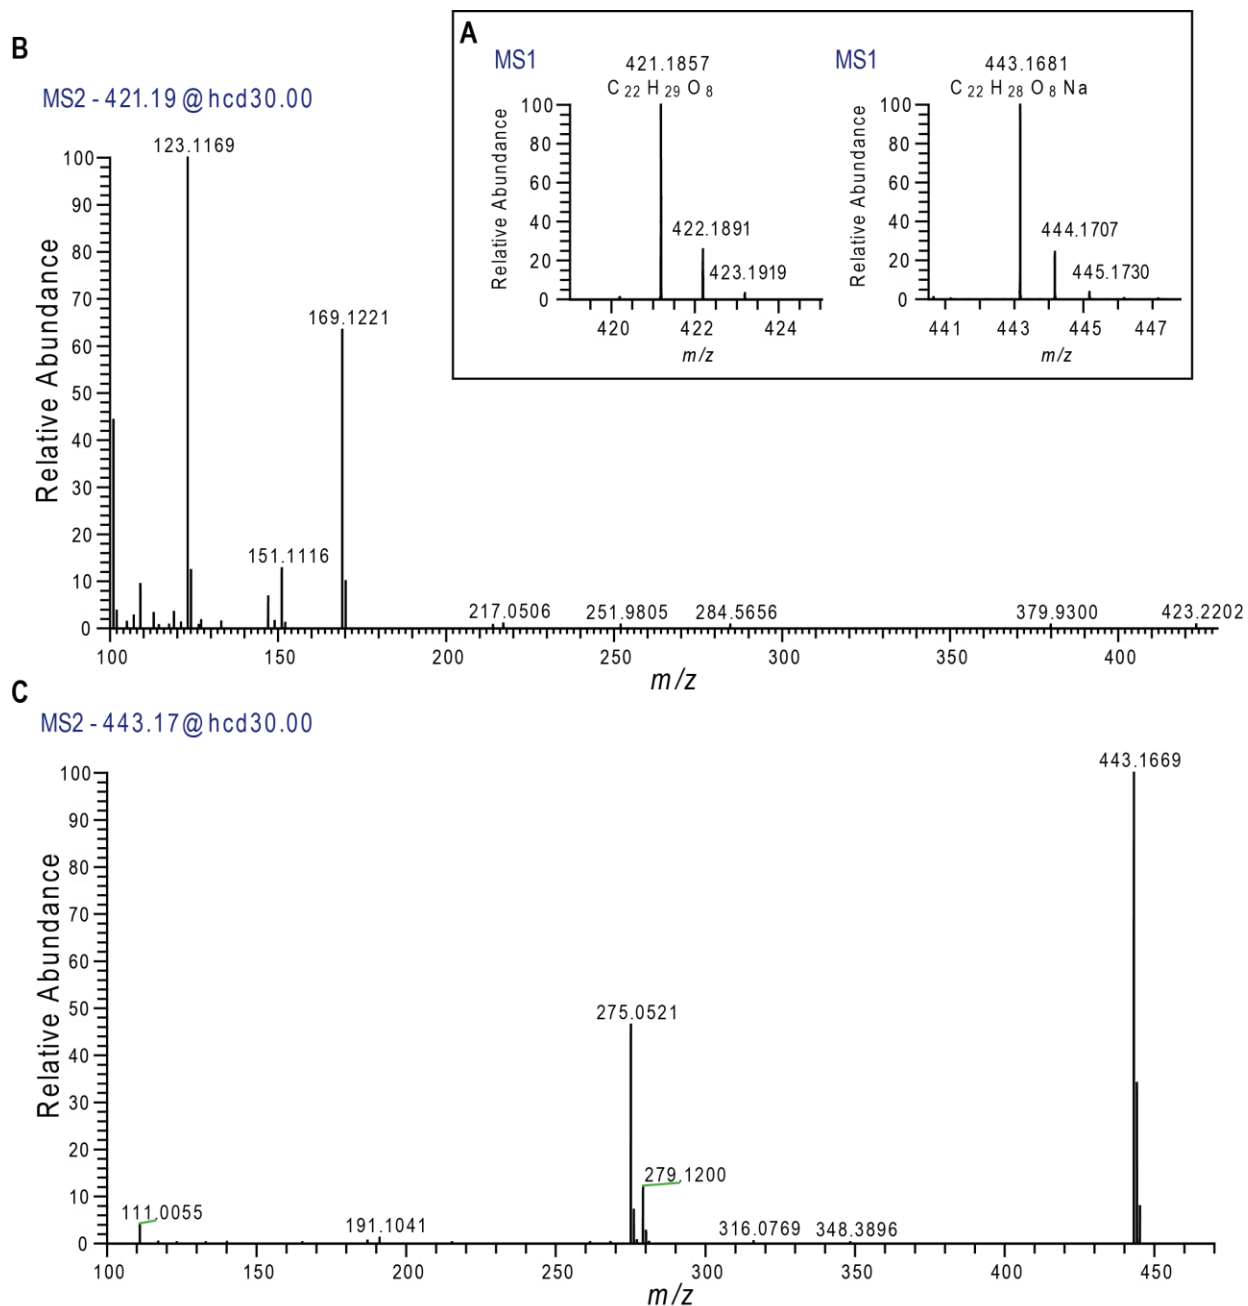

**Figure S8.** CD spectrum of tundrenone (**1**) – 1.27 mg/mL in MeOH

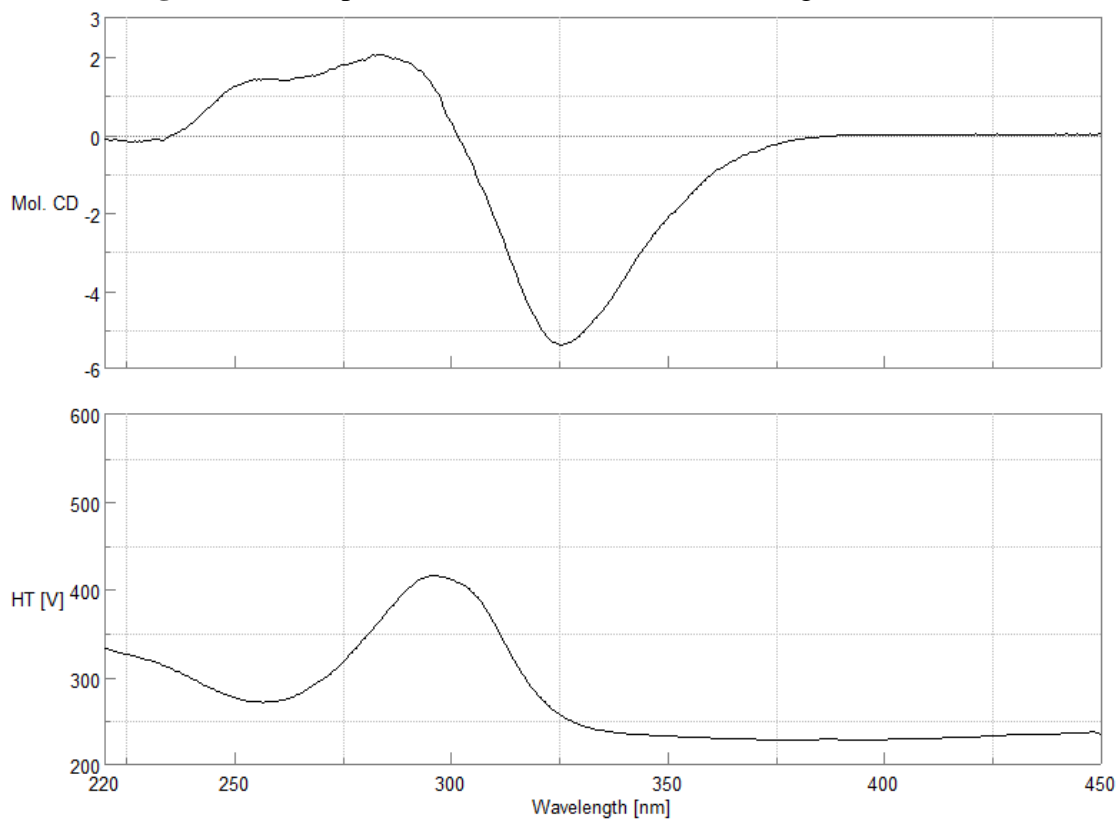

**Figure S9.** Acyl-CoA ligase mutant ( $\Delta tunJ$ ) produces the quorum sensing signal 3-OH-C<sub>10</sub>-HSL.

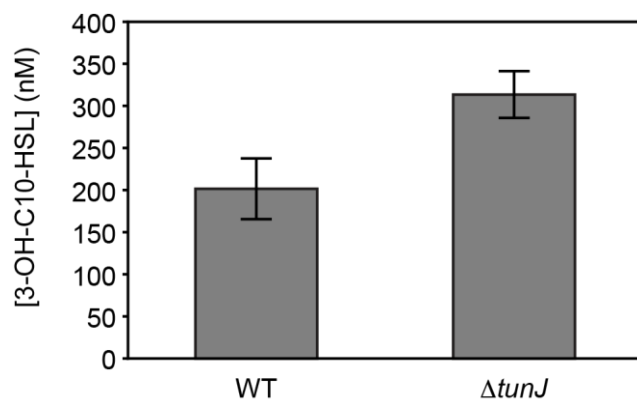

**Figure S10.** Extracted ion chromatogram of the bicyclic ring. Bicyclic ring ( $m/z$  253.06-253.08) from supernatant extracts of wild type (WT) and the acyl-CoA ligase mutant ( $\Delta tunJ$ ) *M. tundripaludum* strains.

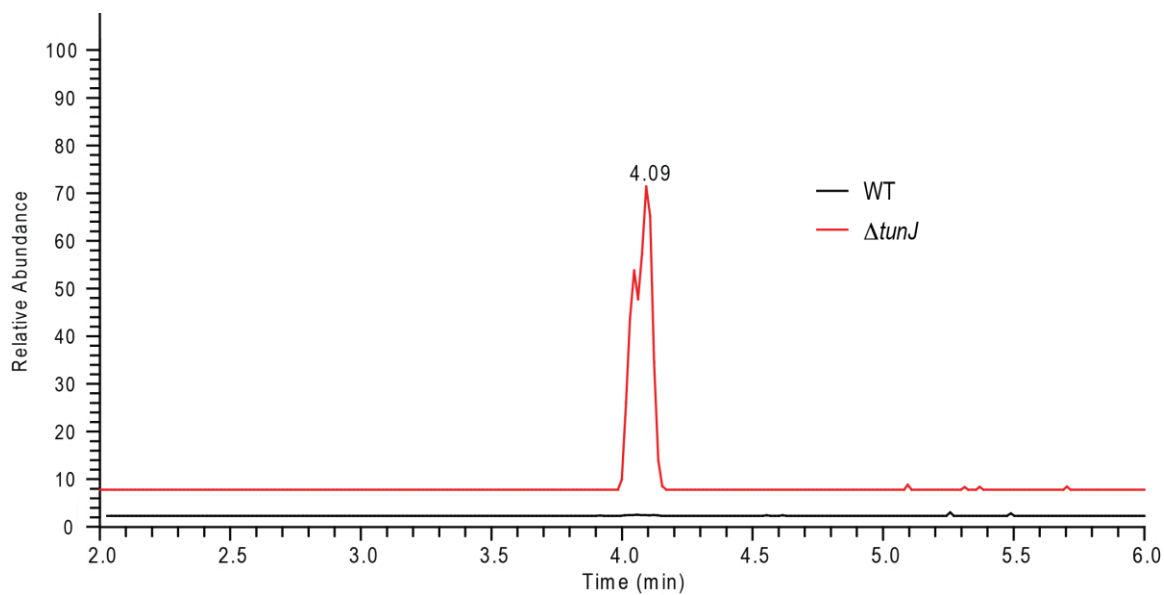

**Figure S11.** Extracted ion chromatogram of an ion corresponding to the modified lipid tail.

(A) Extracted ion chromatogram of the dehydrated lipid tail ( $m/z$  169.11-169.13) from supernatant extracts of wild type (WT) and the acyl-CoA ligase mutant ( $\Delta tunJ$ ) *M. tundripaludum* strains. (B) Extracted ion chromatogram of tundrenone ( $m/z$  421.18-421.19) from the supernatant extracts of the WT and  $\Delta tunJ$  strains. Panel B shows that the ions correlating to the dehydrated lipid tail in the WT strain are the result of in-source fragmentation of complete tundrenone.

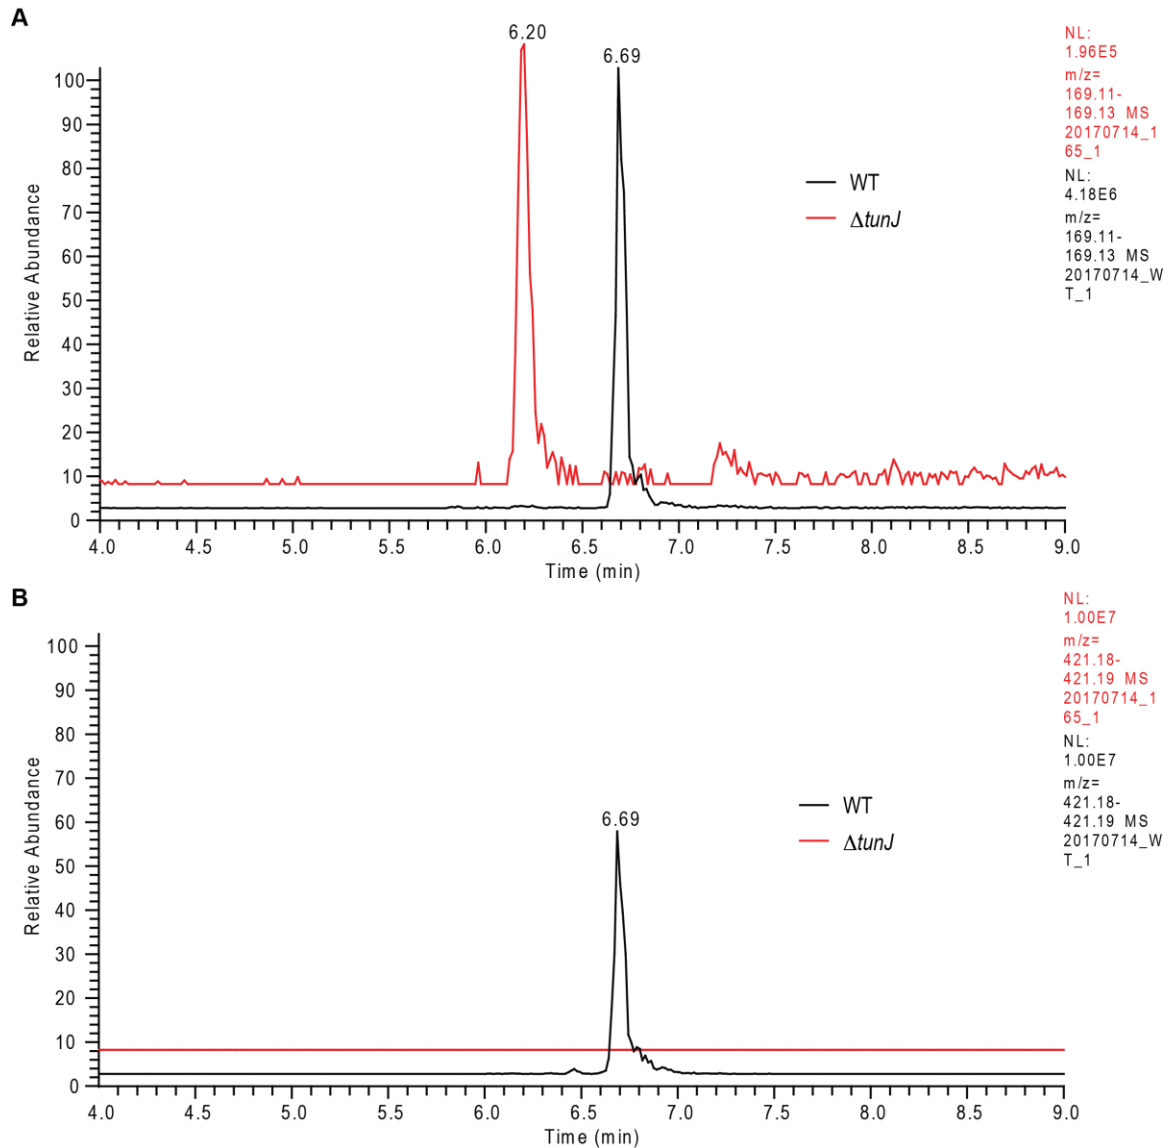



**Table S2.** Primers used in this study.

Homology regions used for Gibson Assembly are underlined.

| Primer Name               | Sequence (5' to 3')                                            | Description                                                                                                          |
|---------------------------|----------------------------------------------------------------|----------------------------------------------------------------------------------------------------------------------|
| AP186_pCM433k<br>anT_fwd1 | ATGTGCAGGTTGTCGGTGTC                                           | For amplifying the backbone of pCM433kanT [ref 3].                                                                   |
| AP187_pCM433k<br>anT_rev1 | TGGTAACTGTCAGACCAAGTTACTC                                      |                                                                                                                      |
| AP634_165U_fwd<br>1       | <u>ATATGAGTAAACTTGGTCTGACAGTTACCAACTG</u><br>TAACAGCTTGCGAATG  | For amplifying flanks to knock out the annotated acyl-CoA ligase gene <i>tunJ</i> (T451DRAFT_0812)                   |
| AP635_165U_rev<br>1       | <u>ATAAAGTTTTTCTAACATAATATATGTCTTTAAAT</u><br>TTTAACGG         |                                                                                                                      |
| AP636_165D_fwd<br>1       | <u>AAGACATATATTATGTTAGAAAACTTTATGCCT</u><br>AAC                |                                                                                                                      |
| AP637_165D_rev<br>1       | <u>CGTGCATCACGACACCGACAACCTGCACATTTTC</u><br>CTTGCATCAGACTCTC  |                                                                                                                      |
| AP705_183U_fwd<br>1       | <u>ATATGAGTAAACTTGGTCTGACAGTTACCACCTTG</u><br>TTTGGCTTACAGTTGG |                                                                                                                      |
| AP706_183U_rev<br>1       | <u>TTCCTTTTCAAAGCTCATGTACTAGTATTGTAGTA</u><br>CGCG             |                                                                                                                      |
| AP707_183D_fwd<br>1       | <u>CAATACTAGTACATGAGCTTTGAAAAGGAACAAT</u><br>AA                |                                                                                                                      |
| AP708_183D_rev<br>1       | <u>CGTGCATCACGACACCGACAACCTGCACATCGCA</u><br>TCTTGAGAAGGAGTCAC |                                                                                                                      |
| AP710_184U_fwd<br>1       | <u>ATATGAGTAAACTTGGTCTGACAGTTACCATTTGG</u><br>AGAAACCGAATGCAC  | For amplifying flanks to knock out the annotated anthranilate synthase component I gene <i>tunN</i> (T451DRAFT_0816) |
| AP711_184U_rev<br>1       | <u>AAGAAAGTTTGCTAACATGATTATTGTTTCCTTTTC</u><br>AA              |                                                                                                                      |
| AP712_184D_fwd<br>1       | <u>GGAACAATAATCATGTTAGCAAACCTTCTTCTATA</u><br>AAAC             |                                                                                                                      |
| AP713_184D_rev<br>1       | <u>CGTGCATCACGACACCGACAACCTGCACATAGTA</u><br>TTTGTGGCGCGATTTG  |                                                                                                                      |
|                           |                                                                |                                                                                                                      |

## Computational Data

**Table S3.** Atom numbers equivalences from manuscript to supporting information

| Carbon number |                         | Proton number |                         |
|---------------|-------------------------|---------------|-------------------------|
| Manuscript    | SI – computational data | Manuscript    | SI – computational data |
| 1             | 1                       | 1             | 19                      |
| 2             | 9                       | 2a/b          | 26/27                   |
| 3             | 10                      | 6             | 20                      |
| 4             | 11                      | 7             | 21                      |
| 5             | 2                       | 8             | 22                      |
| 6             | 3                       | 9             | 23                      |
| 7             | 4                       | 22a/b         | 29/30                   |
| 8             | 5                       | C11-OH        | 28                      |
| 9             | 6                       | C5-OH         | 24                      |
| 10            | 15                      | C6-OH         | 23                      |
| 11            | 16                      | C16-OH        | 25                      |
| 22            | 17                      |               |                         |

**Figure S12.** Atom numbering for computational data

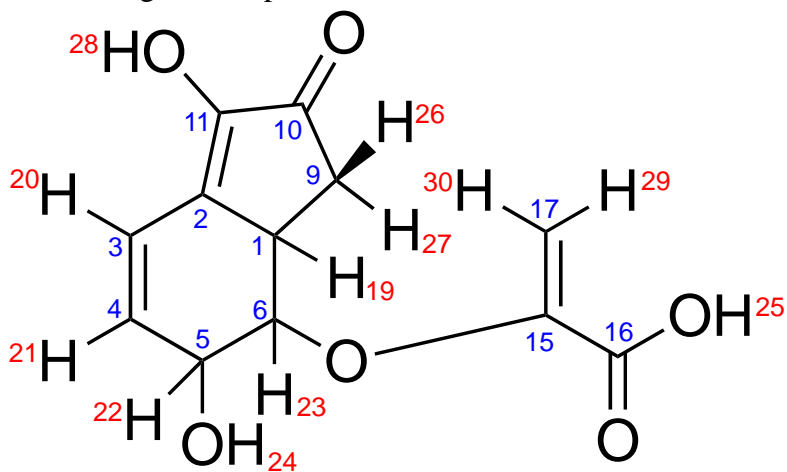

**Table S4.** Coordinates of lowest energy structure of **i** (gas phase, molecular mechanics)

|   |             |             |             |
|---|-------------|-------------|-------------|
| C | -1.97590000 | 0.90720000  | 1.19160000  |
| C | -2.84000000 | 2.15140000  | 1.17690000  |
| C | -3.50680000 | 2.55860000  | 2.39710000  |
| C | -3.58650000 | 1.73510000  | 3.46180000  |
| C | -3.05020000 | 0.30120000  | 3.46660000  |
| C | -2.69740000 | -0.19530000 | 2.01640000  |
| O | -1.94260000 | 0.21810000  | 4.34070000  |
| O | -5.97880000 | -0.72550000 | -0.04850000 |
| C | -1.70580000 | 0.63980000  | -0.29410000 |
| C | -2.09730000 | 1.92700000  | -1.00440000 |
| C | -2.84400000 | 2.72750000  | -0.03630000 |
| O | -1.89190000 | 2.24690000  | -2.17450000 |
| O | -3.42970000 | 3.87400000  | -0.48130000 |
| O | -3.87520000 | -0.52890000 | 1.26170000  |
| C | -4.53820000 | -1.70530000 | 1.50400000  |
| C | -5.75630000 | -1.83110000 | 0.71050000  |
| C | -4.17010000 | -2.68310000 | 2.36570000  |
| O | -6.50870000 | -2.80260000 | 0.71580000  |
| H | -1.03420000 | 1.13290000  | 1.69940000  |
| H | -3.95790000 | 3.54000000  | 2.47120000  |
| H | -4.09330000 | 2.10120000  | 4.34260000  |
| H | -3.82240000 | -0.34840000 | 3.88130000  |
| H | -2.04260000 | -1.06820000 | 2.04860000  |
| H | -2.21110000 | 0.52460000  | 5.21090000  |
| H | -5.24100000 | -0.14740000 | 0.16520000  |
| H | -0.66400000 | 0.39340000  | -0.49680000 |
| H | -2.32640000 | -0.16710000 | -0.68300000 |
| H | -3.21580000 | 3.97210000  | -1.41720000 |
| H | -4.76930000 | -3.57790000 | 2.48140000  |
| H | -3.27950000 | -2.62960000 | 2.97180000  |

**Table S5.** Coordinates of lowest energy structure of **ii** (gas phase, molecular mechanics)

|   |             |             |             |
|---|-------------|-------------|-------------|
| C | -2.43010000 | 0.80060000  | 0.36590000  |
| C | -1.74750000 | 1.75130000  | -0.59560000 |
| C | -0.88860000 | 1.21520000  | -1.63210000 |
| C | -0.87780000 | -0.10070000 | -1.92270000 |
| C | -1.75100000 | -1.13310000 | -1.21110000 |
| C | -2.92480000 | -0.43580000 | -0.43200000 |
| O | -2.19810000 | -2.07680000 | -2.16430000 |
| O | -4.24680000 | -2.61760000 | 2.53970000  |
| C | -3.48750000 | 1.68480000  | 1.03640000  |
| C | -3.03990000 | 3.11190000  | 0.75870000  |
| C | -2.04860000 | 3.02960000  | -0.31110000 |
| O | -3.44870000 | 4.15520000  | 1.26660000  |
| O | -1.61190000 | 4.19690000  | -0.86030000 |
| O | -3.49520000 | -1.27870000 | 0.58120000  |
| C | -4.48520000 | -2.17580000 | 0.26160000  |
| C | -4.89520000 | -2.98610000 | 1.40440000  |
| C | -5.07140000 | -2.35240000 | -0.94650000 |
| O | -5.71730000 | -3.89780000 | 1.36760000  |
| H | -1.70400000 | 0.46600000  | 1.11130000  |
| H | -0.24920000 | 1.87190000  | -2.20880000 |
| H | -0.20790000 | -0.44790000 | -2.69700000 |
| H | -1.11650000 | -1.66670000 | -0.50060000 |
| H | -3.69280000 | -0.08080000 | -1.12250000 |
| H | -2.64930000 | -2.79190000 | -1.70420000 |
| H | -3.68370000 | -1.89480000 | 2.25230000  |
| H | -3.57140000 | 1.50980000  | 2.10840000  |
| H | -4.47300000 | 1.54550000  | 0.59240000  |
| H | -2.04770000 | 4.92360000  | -0.39910000 |
| H | -5.84960000 | -3.09370000 | -1.08420000 |
| H | -4.81160000 | -1.78040000 | -1.82390000 |

**Table S6.** Coordinates of lowest energy structure of **iii** (gas phase, molecular mechanics)

|   |             |             |             |
|---|-------------|-------------|-------------|
| C | -2.00230000 | -4.42730000 | 2.97220000  |
| C | -0.72160000 | -3.72410000 | 3.38400000  |
| C | -0.73780000 | -2.28900000 | 3.59640000  |
| C | -1.79310000 | -1.53690000 | 3.22310000  |
| C | -3.04390000 | -2.11940000 | 2.56510000  |
| C | -2.75700000 | -3.53560000 | 1.94280000  |
| O | -3.57280000 | -1.18630000 | 1.64920000  |
| O | -0.04290000 | -3.44520000 | -0.88300000 |
| C | -1.51660000 | -5.80910000 | 2.51790000  |
| C | -0.10980000 | -5.93680000 | 3.08360000  |
| C | 0.29540000  | -4.59460000 | 3.49620000  |
| O | 0.60090000  | -6.93880000 | 3.14550000  |
| O | 1.58760000  | -4.41580000 | 3.88820000  |
| O | -1.85790000 | -3.47560000 | 0.81890000  |
| C | -2.33520000 | -3.29140000 | -0.45330000 |
| C | -1.27010000 | -3.30080000 | -1.45120000 |
| C | -3.62550000 | -3.11460000 | -0.82310000 |
| O | -1.43560000 | -3.18570000 | -2.66300000 |
| H | -2.64210000 | -4.54770000 | 3.85020000  |
| H | 0.11020000  | -1.79260000 | 4.05160000  |
| H | -1.76650000 | -0.47640000 | 3.43160000  |
| H | -3.80200000 | -2.22570000 | 3.34340000  |
| H | -3.68050000 | -4.04900000 | 1.67140000  |
| H | -2.94590000 | -1.09370000 | 0.92480000  |
| H | -0.21500000 | -3.50000000 | 0.06070000  |
| H | -2.14750000 | -6.62170000 | 2.87690000  |
| H | -1.45340000 | -5.88420000 | 1.43240000  |
| H | 2.03320000  | -5.27080000 | 3.84500000  |
| H | -3.89460000 | -2.98220000 | -1.86390000 |
| H | -4.44300000 | -3.09120000 | -0.11960000 |

**Table S7.** Coordinates of lowest energy structure of **iv** (gas phase, molecular mechanics)

|   |             |             |             |
|---|-------------|-------------|-------------|
| C | -2.93630000 | 1.11990000  | 0.12870000  |
| C | -1.94630000 | 1.72360000  | -0.84730000 |
| C | -0.87310000 | 0.89810000  | -1.36580000 |
| C | -0.87830000 | -0.44070000 | -1.20490000 |
| C | -2.00990000 | -1.20830000 | -0.52120000 |
| C | -3.28880000 | -0.30420000 | -0.37300000 |
| O | -1.53080000 | -1.69190000 | 0.71870000  |
| O | -5.75140000 | -1.50990000 | 2.42980000  |
| C | -4.06130000 | 2.16010000  | 0.17530000  |
| C | -3.45760000 | 3.42340000  | -0.41960000 |
| C | -2.22150000 | 3.01720000  | -1.08340000 |
| O | -3.91600000 | 4.56510000  | -0.41550000 |
| O | -1.56920000 | 3.95000000  | -1.83140000 |
| O | -4.24560000 | -0.81110000 | 0.57020000  |
| C | -5.03860000 | -1.88040000 | 0.23640000  |
| C | -5.89250000 | -2.31000000 | 1.33990000  |
| C | -5.08330000 | -2.51890000 | -0.95720000 |
| O | -6.64920000 | -3.27710000 | 1.31390000  |
| H | -2.46270000 | 1.02860000  | 1.11020000  |
| H | -0.03900000 | 1.34840000  | -1.88910000 |
| H | -0.03910000 | -1.00390000 | -1.58700000 |
| H | -2.25400000 | -2.07890000 | -1.13090000 |
| H | -3.77960000 | -0.18810000 | -1.34240000 |
| H | -2.21760000 | -2.22810000 | 1.12510000  |
| H | -5.11110000 | -0.84760000 | 2.15950000  |
| H | -4.42170000 | 2.34890000  | 1.18600000  |
| H | -4.91200000 | 1.86630000  | -0.43920000 |
| H | -2.05600000 | 4.78000000  | -1.76110000 |
| H | -5.74970000 | -3.35890000 | -1.11320000 |
| H | -4.47920000 | -2.23720000 | -1.80410000 |

**Table S8.** Coordinates of **i-1** (gas phase, B3LYP/6-31+G(d,p))

| Center Number               | Atomic Number | Atomic Type | Coordinates (Angstroms) |           |           |
|-----------------------------|---------------|-------------|-------------------------|-----------|-----------|
|                             |               |             | X                       | Y         | Z         |
| 1                           | 6             | 0           | -1.049283               | 0.665094  | -0.895989 |
| 2                           | 6             | 0           | -1.713754               | 0.497611  | 0.458288  |
| 3                           | 6             | 0           | -1.351349               | 1.393775  | 1.529385  |
| 4                           | 6             | 0           | -0.278147               | 2.204066  | 1.402635  |
| 5                           | 6             | 0           | 0.620320                | 2.218988  | 0.186219  |
| 6                           | 6             | 0           | 0.436237                | 0.984910  | -0.724890 |
| 7                           | 8             | 0           | 0.375743                | 3.352346  | -0.668026 |
| 8                           | 8             | 0           | 1.916931                | -2.220471 | 1.159948  |
| 9                           | 6             | 0           | -1.431761               | -0.599882 | -1.696462 |
| 10                          | 6             | 0           | -2.518658               | -1.253875 | -0.854282 |
| 11                          | 6             | 0           | -2.581733               | -0.544964 | 0.437481  |
| 12                          | 8             | 0           | -3.225548               | -2.215963 | -1.124505 |
| 13                          | 8             | 0           | -3.404861               | -0.974280 | 1.410487  |
| 14                          | 8             | 0           | 1.075725                | -0.157780 | -0.129531 |
| 15                          | 6             | 0           | 2.426827                | -0.352284 | -0.282918 |
| 16                          | 6             | 0           | 2.880062                | -1.591349 | 0.455074  |
| 17                          | 6             | 0           | 3.295007                | 0.398932  | -0.970310 |
| 18                          | 8             | 0           | 4.017595                | -1.997872 | 0.427825  |
| 19                          | 1             | 0           | -1.471996               | 1.555006  | -1.381283 |
| 20                          | 1             | 0           | -1.934093               | 1.383055  | 2.446428  |
| 21                          | 1             | 0           | -0.002323               | 2.869000  | 2.218819  |
| 22                          | 1             | 0           | 1.665870                | 2.243149  | 0.522858  |
| 23                          | 1             | 0           | 0.893330                | 1.191162  | -1.697760 |
| 24                          | 1             | 0           | 0.234686                | 4.139125  | -0.124574 |
| 25                          | 1             | 0           | 1.079480                | -1.734510 | 1.059466  |
| 26                          | 1             | 0           | -1.791252               | -0.395002 | -2.708869 |
| 27                          | 1             | 0           | -0.590074               | -1.297529 | -1.778334 |
| 28                          | 1             | 0           | -3.880253               | -1.749822 | 1.058756  |
| 29                          | 1             | 0           | 4.328525                | 0.078260  | -0.993764 |
| 30                          | 1             | 0           | 3.020817                | 1.304142  | -1.496697 |
| Rotational constants (GHZ): |               |             | 0.5433184               | 0.3252699 | 0.2539359 |

T = 298.15 K

|                                              |                             |
|----------------------------------------------|-----------------------------|
| Zero-point correction=                       | 0.229519 (Hartree/Particle) |
| Thermal correction to Energy=                | 0.245932                    |
| Thermal correction to Enthalpy=              | 0.246876                    |
| Thermal correction to Gibbs Free Energy=     | 0.184476                    |
| Sum of electronic and zero-point Energies=   | -915.629306                 |
| Sum of electronic and thermal Energies=      | -915.612892                 |
| Sum of electronic and thermal Enthalpies=    | -915.611948                 |
| Sum of electronic and thermal Free Energies= | -915.674349                 |

**Table S9.** NMR isotropic and chemical shifts for **i-1** (in ppm) (SCRF-mPW1PW91/6-311+G(2d,p)//B3LYP/6-31+G(d,p), SCRF = IEFPCM, solvent = DMSO)

| Atom | Isotropic | Scaled   |
|------|-----------|----------|
| H19  | 28.131    | 3.393856 |
| H20  | 24.3809   | 6.938374 |
| H21  | 25.2019   | 6.162382 |
| H22  | 27.057    | 4.408979 |
| H23  | 27.1161   | 4.353119 |
| H24  | 30.5767   | 1.082231 |
| H25  | 23.3382   | 7.923913 |
| H26  | 29.058    | 2.517675 |
| H27  | 29.2549   | 2.331569 |
| H28  | 26.1444   | 5.27155  |
| H29  | 25.7999   | 5.597164 |
| H30  | 26.5161   | 4.920227 |
| C1   | 149.3812  | 35.12976 |
| C2   | 45.3155   | 134.2777 |
| C3   | 56.2659   | 123.8448 |
| C4   | 46.9157   | 132.7531 |
| C5   | 120.5618  | 62.58727 |
| C6   | 109.4415  | 73.18207 |
| C9   | 149.8856  | 34.6492  |
| C10  | -23.2669  | 199.6192 |
| C11  | 33.9737   | 145.0836 |
| C15  | 30.829    | 148.0796 |
| C16  | 17.538    | 160.7426 |
| C17  | 85.6081   | 95.8892  |



**Table S10.** Coordinates of **i-2** (gas phase, B3LYP/6-31+G(d,p))

| Center Number               | Atomic Number | Atomic Type | Coordinates (Angstroms) |           |           |
|-----------------------------|---------------|-------------|-------------------------|-----------|-----------|
|                             |               |             | X                       | Y         | Z         |
| 1                           | 6             | 0           | -1.056984               | 0.701282  | -0.889471 |
| 2                           | 6             | 0           | -1.695850               | 0.501509  | 0.472725  |
| 3                           | 6             | 0           | -1.311921               | 1.375899  | 1.554733  |
| 4                           | 6             | 0           | -0.239380               | 2.185064  | 1.427819  |
| 5                           | 6             | 0           | 0.649588                | 2.210882  | 0.207984  |
| 6                           | 6             | 0           | 0.434450                | 0.994743  | -0.730581 |
| 7                           | 8             | 0           | 0.380475                | 3.429776  | -0.506445 |
| 8                           | 8             | 0           | 1.875418                | -2.203457 | 1.196240  |
| 9                           | 6             | 0           | -1.467510               | -0.535878 | -1.718858 |
| 10                          | 6             | 0           | -2.539513               | -1.207592 | -0.870564 |
| 11                          | 6             | 0           | -2.570127               | -0.535376 | 0.440241  |
| 12                          | 8             | 0           | -3.256749               | -2.158377 | -1.154409 |
| 13                          | 8             | 0           | -3.374866               | -0.987236 | 1.419518  |
| 14                          | 8             | 0           | 1.056721                | -0.173877 | -0.159988 |
| 15                          | 6             | 0           | 2.400472                | -0.395821 | -0.317268 |
| 16                          | 6             | 0           | 2.840620                | -1.616988 | 0.460488  |
| 17                          | 6             | 0           | 3.277969                | 0.311070  | -1.039653 |
| 18                          | 8             | 0           | 3.971095                | -2.042593 | 0.434130  |
| 19                          | 1             | 0           | -1.477822               | 1.610902  | -1.339336 |
| 20                          | 1             | 0           | -1.889811               | 1.362116  | 2.474586  |
| 21                          | 1             | 0           | 0.034084                | 2.865393  | 2.229308  |
| 22                          | 1             | 0           | 1.695441                | 2.201685  | 0.542098  |
| 23                          | 1             | 0           | 0.885290                | 1.200521  | -1.707521 |
| 24                          | 1             | 0           | 1.189398                | 3.737638  | -0.936990 |
| 25                          | 1             | 0           | 1.044161                | -1.708170 | 1.088239  |
| 26                          | 1             | 0           | -1.850766               | -0.297192 | -2.715119 |
| 27                          | 1             | 0           | -0.633923               | -1.237068 | -1.842770 |
| 28                          | 1             | 0           | -3.864668               | -1.748066 | 1.056129  |
| 29                          | 1             | 0           | 4.305431                | -0.028452 | -1.058650 |
| 30                          | 1             | 0           | 3.015552                | 1.194034  | -1.607900 |
| Rotational constants (GHZ): |               |             | 0.5393656               | 0.3265453 | 0.2556700 |

T = 298.15 K

|                                              |                             |
|----------------------------------------------|-----------------------------|
| Zero-point correction=                       | 0.229486 (Hartree/Particle) |
| Thermal correction to Energy=                | 0.245858                    |
| Thermal correction to Enthalpy=              | 0.246802                    |
| Thermal correction to Gibbs Free Energy=     | 0.184456                    |
| Sum of electronic and zero-point Energies=   | -915.627908                 |
| Sum of electronic and thermal Energies=      | -915.611536                 |
| Sum of electronic and thermal Enthalpies=    | -915.610592                 |
| Sum of electronic and thermal Free Energies= | -915.672938                 |

**Table S11.** NMR isotropic and chemical shifts for **i-2** (in ppm) (SCRF-mPW1PW91/6-311+G(2d,p)//B3LYP/6-31+G(d,p), SCRF = IEFPCM, solvent = DMSO)

| Atom | Isotropic | Scaled   |
|------|-----------|----------|
| H19  | 28.1961   | 3.332325 |
| H20  | 24.4391   | 6.883365 |
| H21  | 25.2071   | 6.157467 |
| H22  | 27.0492   | 4.416352 |
| H23  | 27.1182   | 4.351134 |
| H24  | 29.9163   | 1.706427 |
| H25  | 23.3419   | 7.920416 |
| H26  | 29.0659   | 2.510208 |
| H27  | 29.2928   | 2.295747 |
| H28  | 26.1807   | 5.23724  |
| H29  | 25.7996   | 5.597448 |
| H30  | 26.5931   | 4.847448 |
|      |           |          |
| C1   | 149.6385  | 34.88462 |
| C2   | 45.0884   | 134.4941 |
| C3   | 57.43     | 122.7357 |
| C4   | 46.5046   | 133.1448 |
| C5   | 120.5654  | 62.58384 |
| C6   | 107.8272  | 74.72008 |
| C9   | 149.7783  | 34.75143 |
| C10  | -23.2318  | 199.5857 |
| C11  | 34.129    | 144.9356 |
| C15  | 31.0193   | 147.8983 |
| C16  | 17.5494   | 160.7317 |
| C17  | 86.1741   | 95.34994 |

**Table S12.** Coordinates of **i-4** (gas phase, B3LYP/6-31+G(d,p))

| Center<br>Number            | Atomic<br>Number | Atomic<br>Type | Coordinates (Angstroms) |           |           |
|-----------------------------|------------------|----------------|-------------------------|-----------|-----------|
|                             |                  |                | X                       | Y         | Z         |
| 1                           | 6                | 0              | -1.054147               | 0.623325  | -0.905391 |
| 2                           | 6                | 0              | -1.758607               | 0.493305  | 0.432281  |
| 3                           | 6                | 0              | -1.453463               | 1.436812  | 1.478922  |
| 4                           | 6                | 0              | -0.394304               | 2.265643  | 1.357490  |
| 5                           | 6                | 0              | 0.546752                | 2.254045  | 0.175259  |
| 6                           | 6                | 0              | 0.418336                | 0.990943  | -0.707528 |
| 7                           | 8                | 0              | 0.323472                | 3.363880  | -0.718171 |
| 8                           | 8                | 0              | 1.938872                | -2.281800 | 0.972429  |
| 9                           | 6                | 0              | -1.371817               | -0.688231 | -1.657637 |
| 10                          | 6                | 0              | -2.470556               | -1.333557 | -0.826229 |
| 11                          | 6                | 0              | -2.598550               | -0.571206 | 0.427810  |
| 12                          | 8                | 0              | -3.141849               | -2.327308 | -1.077180 |
| 13                          | 8                | 0              | -3.443952               | -0.983005 | 1.390942  |
| 14                          | 8                | 0              | 1.068637                | -0.121565 | -0.079682 |
| 15                          | 6                | 0              | 2.413794                | -0.274774 | -0.217897 |
| 16                          | 6                | 0              | 2.920622                | -1.534018 | 0.426214  |
| 17                          | 6                | 0              | 3.281010                | 0.535720  | -0.845280 |
| 18                          | 8                | 0              | 4.090990                | -1.858535 | 0.454901  |
| 19                          | 1                | 0              | -1.488577               | 1.476812  | -1.443320 |
| 20                          | 1                | 0              | -2.065572               | 1.445532  | 2.376662  |
| 21                          | 1                | 0              | -0.158999               | 2.964723  | 2.157960  |
| 22                          | 1                | 0              | 1.577229                | 2.305110  | 0.552491  |
| 23                          | 1                | 0              | 0.887007                | 1.194996  | -1.676717 |
| 24                          | 1                | 0              | 0.082208                | 4.144754  | -0.202304 |
| 25                          | 1                | 0              | 2.370783                | -3.064304 | 1.355261  |
| 26                          | 1                | 0              | -1.694643               | -0.544487 | -2.692784 |
| 27                          | 1                | 0              | -0.508413               | -1.363452 | -1.663754 |
| 28                          | 1                | 0              | -3.879230               | -1.788841 | 1.056105  |
| 29                          | 1                | 0              | 4.322879                | 0.244955  | -0.871199 |
| 30                          | 1                | 0              | 2.991545                | 1.462827  | -1.322388 |
| Rotational constants (GHZ): |                  |                | 0.5404650               | 0.3265140 | 0.2495813 |

T = 298.15 K

|                                              |                             |
|----------------------------------------------|-----------------------------|
| Zero-point correction=                       | 0.229576 (Hartree/Particle) |
| Thermal correction to Energy=                | 0.246009                    |
| Thermal correction to Enthalpy=              | 0.246954                    |
| Thermal correction to Gibbs Free Energy=     | 0.184403                    |
| Sum of electronic and zero-point Energies=   | -915.629869                 |
| Sum of electronic and thermal Energies=      | -915.613435                 |
| Sum of electronic and thermal Enthalpies=    | -915.612491                 |
| Sum of electronic and thermal Free Energies= | -915.675042                 |

**Table S13.** NMR isotropic and scaled chemical shifts for **i-4** (in ppm) (SCRF-mPW1PW91/6-311+G(2d,p)//B3LYP/6-31+G(d,p), SCRF = IEFPCM, solvent = DMSO)

| Atom | Isotropic | Scaled   |
|------|-----------|----------|
| H19  | 28.1787   | 3.348771 |
| H20  | 24.3861   | 6.933459 |
| H21  | 25.2065   | 6.158034 |
| H22  | 27.0017   | 4.461248 |
| H23  | 27.2499   | 4.226654 |
| H24  | 30.6732   | 0.991021 |
| H25  | 25.3638   | 6.009357 |
| H26  | 29.0795   | 2.497353 |
| H27  | 29.1869   | 2.395841 |
| H28  | 26.1984   | 5.22051  |
| H29  | 25.7843   | 5.611909 |
| H30  | 26.5745   | 4.865028 |
| C1   | 149.2252  | 35.27839 |
| C2   | 44.9662   | 134.6105 |
| C3   | 56.4193   | 123.6986 |
| C4   | 47.1117   | 132.5664 |
| C5   | 120.5901  | 62.56031 |
| C6   | 109.6152  | 73.01658 |
| C9   | 149.7429  | 34.78516 |
| C10  | -23.7276  | 200.0581 |
| C11  | 34.3618   | 144.7138 |
| C15  | 29.5208   | 149.326  |
| C16  | 15.3411   | 162.8357 |
| C17  | 83.8135   | 97.59899 |

**Table S14.** Coordinates of **i-5** (gas phase, B3LYP/6-31+G(d,p))

| Center Number               | Atomic Number | Atomic Type | Coordinates (Angstroms) |           |           |
|-----------------------------|---------------|-------------|-------------------------|-----------|-----------|
|                             |               |             | X                       | Y         | Z         |
| 1                           | 6             | 0           | -1.083390               | 0.578592  | -0.904447 |
| 2                           | 6             | 0           | -1.794287               | 0.461975  | 0.431087  |
| 3                           | 6             | 0           | -1.510232               | 1.427593  | 1.462959  |
| 4                           | 6             | 0           | -0.465723               | 2.273693  | 1.332660  |
| 5                           | 6             | 0           | 0.479936                | 2.260302  | 0.154642  |
| 6                           | 6             | 0           | 0.380476                | 0.980146  | -0.707632 |
| 7                           | 8             | 0           | 0.241747                | 3.352426  | -0.757369 |
| 8                           | 8             | 0           | 4.193496                | -1.676862 | 0.414870  |
| 9                           | 6             | 0           | -1.371523               | -0.754107 | -1.630977 |
| 10                          | 6             | 0           | -2.475602               | -1.393651 | -0.802265 |
| 11                          | 6             | 0           | -2.620771               | -0.612970 | 0.439227  |
| 12                          | 8             | 0           | -3.139706               | -2.393526 | -1.046383 |
| 13                          | 8             | 0           | -3.470016               | -1.016652 | 1.401635  |
| 14                          | 8             | 0           | 1.051422                | -0.107644 | -0.061009 |
| 15                          | 6             | 0           | 2.395770                | -0.243013 | -0.199796 |
| 16                          | 6             | 0           | 2.847801                | -1.508019 | 0.471055  |
| 17                          | 6             | 0           | 3.245885                | 0.578967  | -0.838029 |
| 18                          | 8             | 0           | 2.110008                | -2.305119 | 1.006543  |
| 19                          | 1             | 0           | -1.531578               | 1.411792  | -1.462731 |
| 20                          | 1             | 0           | -2.125510               | 1.439044  | 2.358486  |
| 21                          | 1             | 0           | -0.245427               | 2.988494  | 2.123421  |
| 22                          | 1             | 0           | 1.507366                | 2.337988  | 0.535626  |
| 23                          | 1             | 0           | 0.846605                | 1.179174  | -1.679231 |
| 24                          | 1             | 0           | -0.061936               | 4.122481  | -0.258630 |
| 25                          | 1             | 0           | 4.384084                | -2.519376 | 0.859441  |
| 26                          | 1             | 0           | -1.677006               | -0.640254 | -2.675004 |
| 27                          | 1             | 0           | -0.499971               | -1.418396 | -1.602515 |
| 28                          | 1             | 0           | -3.887817               | -1.837485 | 1.081358  |
| 29                          | 1             | 0           | 4.295132                | 0.322336  | -0.878157 |
| 30                          | 1             | 0           | 2.930408                | 1.496164  | -1.319261 |
| Rotational constants (GHZ): |               |             | 0.5447354               | 0.3197985 | 0.2457186 |

T = 298.15 K

|                                              |                             |
|----------------------------------------------|-----------------------------|
| Zero-point correction=                       | 0.229427 (Hartree/Particle) |
| Thermal correction to Energy=                | 0.245936                    |
| Thermal correction to Enthalpy=              | 0.246880                    |
| Thermal correction to Gibbs Free Energy=     | 0.184025                    |
| Sum of electronic and zero-point Energies=   | -915.629179                 |
| Sum of electronic and thermal Energies=      | -915.612669                 |
| Sum of electronic and thermal Enthalpies=    | -915.611725                 |
| Sum of electronic and thermal Free Energies= | -915.674581                 |

**Table S15.** NMR isotropic and chemical shifts for **i-5** (in ppm) (SCRF-mPW1PW91/6-311+G(2d,p)//B3LYP/6-31+G(d,p), SCRF = IEFPCM, solvent = DMSO)

| Atom | Isotropic | Scaled   |
|------|-----------|----------|
| H19  | 28.1901   | 3.337996 |
| H20  | 24.3981   | 6.922117 |
| H21  | 25.2212   | 6.14414  |
| H22  | 27.024    | 4.44017  |
| H23  | 27.2796   | 4.198582 |
| H24  | 30.7068   | 0.959263 |
| H25  | 25.5213   | 5.860491 |
| H26  | 29.1038   | 2.474386 |
| H27  | 29.2176   | 2.366824 |
| H28  | 26.2089   | 5.210586 |
| H29  | 25.8012   | 5.595936 |
| H30  | 26.4024   | 5.027694 |
|      |           |          |
| C1   | 149.2698  | 35.2359  |
| C2   | 45.3095   | 134.2834 |
| C3   | 56.3059   | 123.8067 |
| C4   | 47.4131   | 132.2792 |
| C5   | 120.57    | 62.57946 |
| C6   | 110.0483  | 72.60394 |
| C9   | 149.6753  | 34.84956 |
| C10  | -23.7486  | 200.0781 |
| C11  | 34.3778   | 144.6986 |
| C15  | 31.0443   | 147.8745 |
| C16  | 16.4665   | 161.7634 |
| C17  | 83.6891   | 97.71751 |

**Table S16.** Coordinates of **i-6** (gas phase, B3LYP/6-31+G(d,p))

| Center<br>Number | Atomic<br>Number | Atomic<br>Type | Coordinates (Angstroms) |           |           |
|------------------|------------------|----------------|-------------------------|-----------|-----------|
|                  |                  |                | X                       | Y         | Z         |
| 1                | 6                | 0              | -1.060479               | 0.658203  | -0.900843 |
| 2                | 6                | 0              | -1.740891               | 0.498734  | 0.445948  |
| 3                | 6                | 0              | -1.417633               | 1.424805  | 1.503148  |
| 4                | 6                | 0              | -0.361523               | 2.255193  | 1.380759  |
| 5                | 6                | 0              | 0.571516                | 2.253576  | 0.195312  |
| 6                | 6                | 0              | 0.417774                | 1.002653  | -0.711618 |
| 7                | 8                | 0              | 0.310863                | 3.447945  | -0.565260 |
| 8                | 8                | 0              | 1.886966                | -2.283410 | 0.995934  |
| 9                | 6                | 0              | -1.402474               | -0.629746 | -1.682494 |
| 10               | 6                | 0              | -2.487214               | -1.291486 | -0.844289 |
| 11               | 6                | 0              | -2.585838               | -0.561580 | 0.429610  |
| 12               | 8                | 0              | -3.166828               | -2.276268 | -1.109470 |
| 13               | 8                | 0              | -3.414436               | -0.993683 | 1.399689  |
| 14               | 8                | 0              | 1.053024                | -0.132394 | -0.102190 |
| 15               | 6                | 0              | 2.392003                | -0.312983 | -0.241793 |
| 16               | 6                | 0              | 2.879071                | -1.568804 | 0.427817  |
| 17               | 6                | 0              | 3.275472                | 0.463640  | -0.889724 |
| 18               | 8                | 0              | 4.043503                | -1.913406 | 0.454820  |
| 19               | 1                | 0              | -1.495160               | 1.531346  | -1.406691 |
| 20               | 1                | 0              | -2.026088               | 1.431188  | 2.403145  |
| 21               | 1                | 0              | -0.132070               | 2.972625  | 2.163638  |
| 22               | 1                | 0              | 1.602832                | 2.276034  | 0.571629  |
| 23               | 1                | 0              | 0.883091                | 1.202486  | -1.684674 |
| 24               | 1                | 0              | 1.120810                | 3.727023  | -1.013379 |
| 25               | 1                | 0              | 2.303732                | -3.066365 | 1.394493  |
| 26               | 1                | 0              | -1.748708               | -0.454552 | -2.705252 |
| 27               | 1                | 0              | -0.544346               | -1.310054 | -1.728045 |
| 28               | 1                | 0              | -3.863006               | -1.786574 | 1.052372  |
| 29               | 1                | 0              | 4.311276                | 0.152220  | -0.911803 |
| 30               | 1                | 0              | 3.004191                | 1.381119  | -1.394613 |

Rotational constants (GHZ):      0.5354445      0.3285674      0.2509782

T = 298.15 K

|                                              |                             |
|----------------------------------------------|-----------------------------|
| Zero-point correction=                       | 0.229535 (Hartree/Particle) |
| Thermal correction to Energy=                | 0.245929                    |
| Thermal correction to Enthalpy=              | 0.246873                    |
| Thermal correction to Gibbs Free Energy=     | 0.184374                    |
| Sum of electronic and zero-point Energies=   | -915.628250                 |
| Sum of electronic and thermal Energies=      | -915.611855                 |
| Sum of electronic and thermal Enthalpies=    | -915.610911                 |
| Sum of electronic and thermal Free Energies= | -915.673410                 |

**Table S17.** NMR isotropic and chemical shifts for **i-6** (in ppm) (SCRF-mPW1PW91/6-311+G(2d,p)//B3LYP/6-31+G(d,p), SCRF = IEFPCM, solvent = DMSO)

| Atom | Isotropic | Scaled   |
|------|-----------|----------|
| H19  | 28.2327   | 3.297732 |
| H20  | 24.4441   | 6.878639 |
| H21  | 25.2016   | 6.162665 |
| H22  | 26.985    | 4.477032 |
| H23  | 27.272    | 4.205766 |
| H24  | 29.978    | 1.64811  |
| H25  | 25.3768   | 5.99707  |
| H26  | 29.0876   | 2.489698 |
| H27  | 29.2403   | 2.345369 |
| H28  | 26.2487   | 5.172968 |
| H29  | 25.7895   | 5.606994 |
| H30  | 26.717    | 4.73034  |
|      |           |          |
| C1   | 149.3831  | 35.12795 |
| C2   | 44.696    | 134.8679 |
| C3   | 57.6424   | 122.5333 |
| C4   | 46.5443   | 133.107  |
| C5   | 120.5542  | 62.59451 |
| C6   | 107.8875  | 74.66263 |
| C9   | 149.6771  | 34.84785 |
| C10  | -23.6632  | 199.9968 |
| C11  | 34.6238   | 144.4642 |
| C15  | 29.7796   | 149.0795 |
| C16  | 15.4193   | 162.7611 |
| C17  | 84.6654   | 96.78735 |



**Table S18.** Coordinates of **iii-2** (gas phase, B3LYP/6-31+G(d,p)) (redundant to **iii-1**)

| Center<br>Number            | Atomic<br>Number | Atomic<br>Type | Coordinates (Angstroms) |           |           |
|-----------------------------|------------------|----------------|-------------------------|-----------|-----------|
|                             |                  |                | X                       | Y         | Z         |
| 1                           | 6                | 0              | -0.991098               | 0.633211  | -1.093300 |
| 2                           | 6                | 0              | -1.752305               | 0.745258  | 0.217268  |
| 3                           | 6                | 0              | -1.469572               | 1.857724  | 1.093472  |
| 4                           | 6                | 0              | -0.403313               | 2.650819  | 0.853648  |
| 5                           | 6                | 0              | 0.564717                | 2.438783  | -0.292563 |
| 6                           | 6                | 0              | 0.479612                | 1.011696  | -0.884504 |
| 7                           | 8                | 0              | 1.897012                | 2.773969  | 0.078403  |
| 8                           | 8                | 0              | 1.426383                | -2.057188 | 1.448791  |
| 9                           | 6                | 0              | -1.308629               | -0.780569 | -1.628531 |
| 10                          | 6                | 0              | -2.447297               | -1.265661 | -0.739022 |
| 11                          | 6                | 0              | -2.604748               | -0.300872 | 0.362346  |
| 12                          | 8                | 0              | -3.120789               | -2.282119 | -0.845525 |
| 13                          | 8                | 0              | -3.487480               | -0.531208 | 1.351949  |
| 14                          | 8                | 0              | 1.063581                | 0.072739  | 0.044662  |
| 15                          | 6                | 0              | 2.281590                | -0.521727 | -0.208277 |
| 16                          | 6                | 0              | 2.459367                | -1.767313 | 0.630272  |
| 17                          | 6                | 0              | 3.238853                | -0.107210 | -1.044819 |
| 18                          | 8                | 0              | 3.449560                | -2.458201 | 0.584628  |
| 19                          | 1                | 0              | -1.391856               | 1.383689  | -1.791280 |
| 20                          | 1                | 0              | -2.109647               | 2.030020  | 1.954125  |
| 21                          | 1                | 0              | -0.179641               | 3.495063  | 1.500940  |
| 22                          | 1                | 0              | 0.324961                | 3.141895  | -1.102147 |
| 23                          | 1                | 0              | 1.034215                | 0.965354  | -1.825469 |
| 24                          | 1                | 0              | 2.162573                | 2.202403  | 0.813832  |
| 25                          | 1                | 0              | 0.735073                | -1.380136 | 1.339455  |
| 26                          | 1                | 0              | -1.598584               | -0.800739 | -2.682918 |
| 27                          | 1                | 0              | -0.460274               | -1.464525 | -1.508564 |
| 28                          | 1                | 0              | -3.928844               | -1.376614 | 1.148807  |
| 29                          | 1                | 0              | 4.132850                | -0.712257 | -1.126484 |
| 30                          | 1                | 0              | 3.169992                | 0.807092  | -1.619502 |
| Rotational constants (GHZ): |                  |                | 0.5469815               | 0.3502153 | 0.2616061 |

T = 298.15 K

|                                              |                             |
|----------------------------------------------|-----------------------------|
| Zero-point correction=                       | 0.229760 (Hartree/Particle) |
| Thermal correction to Energy=                | 0.245890                    |
| Thermal correction to Enthalpy=              | 0.246834                    |
| Thermal correction to Gibbs Free Energy=     | 0.185046                    |
| Sum of electronic and zero-point Energies=   | -915.628520                 |
| Sum of electronic and thermal Energies=      | -915.612390                 |
| Sum of electronic and thermal Enthalpies=    | -915.611446                 |
| Sum of electronic and thermal Free Energies= | -915.673234                 |

**Table S19.** NMR isotropic and chemical shifts for **iii-2** (in ppm) (SCRF-mPW1PW91/6-311+G(2d,p)//B3LYP/6-31+G(d,p), SCRF = IEFPCM, solvent = DMSO)

| Atom | Isotropic | Scaled   |
|------|-----------|----------|
| H19  | 28.3282   | 3.207467 |
| H20  | 24.4843   | 6.840643 |
| H21  | 25.267    | 6.100851 |
| H22  | 26.7676   | 4.682514 |
| H23  | 26.8893   | 4.567486 |
| H24  | 30.2599   | 1.381664 |
| H25  | 23.1653   | 8.087335 |
| H26  | 29.1304   | 2.449244 |
| H27  | 29.4768   | 2.121834 |
| H28  | 26.2342   | 5.186673 |
| H29  | 25.6883   | 5.702647 |
| H30  | 26.1722   | 5.245274 |
|      |           |          |
| C1   | 144.3109  | 39.96046 |
| C2   | 44.1972   | 135.3432 |
| C3   | 58.4499   | 121.764  |
| C4   | 39.6529   | 139.6727 |
| C5   | 111.1162  | 71.58651 |
| C6   | 103.1684  | 79.15873 |
| C9   | 148.993   | 35.49962 |
| C10  | -22.3767  | 198.7711 |
| C11  | 34.5947   | 144.4919 |
| C15  | 26.9843   | 151.7427 |
| C16  | 17.6582   | 160.628  |
| C17  | 81.8543   | 99.46561 |

**Table S20.** Coordinates of **iii-3** (gas phase, B3LYP/6-31+G(d,p))

| Center<br>Number            | Atomic<br>Number | Atomic<br>Type | Coordinates (Angstroms) |           |           |
|-----------------------------|------------------|----------------|-------------------------|-----------|-----------|
|                             |                  |                | X                       | Y         | Z         |
| 1                           | 6                | 0              | 0.983740                | 0.605962  | 1.096134  |
| 2                           | 6                | 0              | 1.790465                | 0.745746  | -0.183446 |
| 3                           | 6                | 0              | 1.564298                | 1.892085  | -1.030097 |
| 4                           | 6                | 0              | 0.506104                | 2.698678  | -0.803219 |
| 5                           | 6                | 0              | -0.509428               | 2.469120  | 0.296204  |
| 6                           | 6                | 0              | -0.473216               | 1.026335  | 0.859440  |
| 7                           | 8                | 0              | -1.820900               | 2.831665  | -0.127976 |
| 8                           | 8                | 0              | -1.353063               | -2.209880 | -1.146380 |
| 9                           | 6                | 0              | 1.243028                | -0.837800 | 1.580099  |
| 10                          | 6                | 0              | 2.389803                | -1.323189 | 0.703619  |
| 11                          | 6                | 0              | 2.616672                | -0.317640 | -0.344429 |
| 12                          | 8                | 0              | 3.020431                | -2.371288 | 0.780810  |
| 13                          | 8                | 0              | 3.522895                | -0.537621 | -1.317096 |
| 14                          | 8                | 0              | -1.051014               | 0.111474  | -0.089913 |
| 15                          | 6                | 0              | -2.284989               | -0.430858 | 0.134018  |
| 16                          | 6                | 0              | -2.478573               | -1.750363 | -0.558163 |
| 17                          | 6                | 0              | -3.285931               | 0.083818  | 0.863553  |
| 18                          | 8                | 0              | -3.531990               | -2.354584 | -0.586704 |
| 19                          | 1                | 0              | 1.382156                | 1.316844  | 1.836093  |
| 20                          | 1                | 0              | 2.237960                | 2.077546  | -1.861891 |
| 21                          | 1                | 0              | 0.322311                | 3.567334  | -1.430612 |
| 22                          | 1                | 0              | -0.298274               | 3.151186  | 1.131414  |
| 23                          | 1                | 0              | -1.047247               | 0.982057  | 1.790639  |
| 24                          | 1                | 0              | -2.053568               | 2.276628  | -0.887120 |
| 25                          | 1                | 0              | -1.585493               | -3.059376 | -1.558650 |
| 26                          | 1                | 0              | 1.498421                | -0.913122 | 2.641062  |
| 27                          | 1                | 0              | 0.379279                | -1.485897 | 1.395241  |
| 28                          | 1                | 0              | 3.922500                | -1.408229 | -1.136203 |
| 29                          | 1                | 0              | -4.202566               | -0.484991 | 0.950864  |
| 30                          | 1                | 0              | -3.218194               | 1.050540  | 1.344968  |
| Rotational constants (GHZ): |                  |                | 0.5451864               | 0.3563558 | 0.2570285 |

T = 298.15 K

|                                              |                             |
|----------------------------------------------|-----------------------------|
| Zero-point correction=                       | 0.229795 (Hartree/Particle) |
| Thermal correction to Energy=                | 0.245945                    |
| Thermal correction to Enthalpy=              | 0.246889                    |
| Thermal correction to Gibbs Free Energy=     | 0.184982                    |
| Sum of electronic and zero-point Energies=   | -915.629483                 |
| Sum of electronic and thermal Energies=      | -915.613334                 |
| Sum of electronic and thermal Enthalpies=    | -915.612390                 |
| Sum of electronic and thermal Free Energies= | -915.674296                 |

**Table S21.** NMR isotropic and chemical shifts for **iii-3** (in ppm) (SCRF-mPW1PW91/6-311+G(2d,p)//B3LYP/6-31+G(d,p), SCRF = IEFPCM, solvent = DMSO)

| Atom | Isotropic | Scaled   |
|------|-----------|----------|
| H19  | 28.3743   | 3.163894 |
| H20  | 24.527    | 6.800284 |
| H21  | 25.3067   | 6.063327 |
| H22  | 26.7816   | 4.669282 |
| H23  | 27.0224   | 4.441682 |
| H24  | 30.2819   | 1.36087  |
| H25  | 25.3634   | 6.009735 |
| H26  | 29.1427   | 2.437618 |
| H27  | 29.3303   | 2.260302 |
| H28  | 26.2827   | 5.140832 |
| H29  | 25.6118   | 5.774953 |
| H30  | 26.0266   | 5.382892 |
|      |           |          |
| C1   | 143.903   | 40.34909 |
| C2   | 43.2616   | 136.2346 |
| C3   | 58.6505   | 121.5729 |
| C4   | 39.7047   | 139.6234 |
| C5   | 110.9713  | 71.72456 |
| C6   | 101.7533  | 80.50696 |
| C9   | 148.817   | 35.6673  |
| C10  | -22.8358  | 199.2085 |
| C11  | 35.1665   | 143.9471 |
| C15  | 25.1908   | 153.4514 |
| C16  | 15.2816   | 162.8923 |
| C17  | 77.6713   | 103.4509 |

**Table S22.** Coordinates of **iii-4** (gas phase, B3LYP/6-31+G(d,p))

| Center<br>Number            | Atomic<br>Number | Atomic<br>Type | Coordinates (Angstroms) |           |           |
|-----------------------------|------------------|----------------|-------------------------|-----------|-----------|
|                             |                  |                | X                       | Y         | Z         |
| 1                           | 6                | 0              | 1.003098                | 0.530428  | 1.082111  |
| 2                           | 6                | 0              | 1.836685                | 0.693668  | -0.177827 |
| 3                           | 6                | 0              | 1.661765                | 1.876063  | -0.985541 |
| 4                           | 6                | 0              | 0.631834                | 2.713785  | -0.742438 |
| 5                           | 6                | 0              | -0.403388               | 2.485180  | 0.337972  |
| 6                           | 6                | 0              | -0.431775               | 1.022961  | 0.849946  |
| 7                           | 8                | 0              | -1.696158               | 2.912432  | -0.086950 |
| 8                           | 8                | 0              | -3.692410               | -2.139612 | -0.611029 |
| 9                           | 6                | 0              | 1.198377                | -0.943446 | 1.502044  |
| 10                          | 6                | 0              | 2.372002                | -1.415494 | 0.654769  |
| 11                          | 6                | 0              | 2.641022                | -0.383030 | -0.358240 |
| 12                          | 8                | 0              | 2.994486                | -2.468118 | 0.726656  |
| 13                          | 8                | 0              | 3.567403                | -0.589048 | -1.314163 |
| 14                          | 8                | 0              | -1.045790               | 0.168987  | -0.132747 |
| 15                          | 6                | 0              | -2.289689               | -0.346744 | 0.082214  |
| 16                          | 6                | 0              | -2.411063               | -1.697329 | -0.561695 |
| 17                          | 6                | 0              | -3.293106               | 0.219794  | 0.770219  |
| 18                          | 8                | 0              | -1.477680               | -2.341604 | -0.988922 |
| 19                          | 1                | 0              | 1.420221                | 1.189130  | 1.859549  |
| 20                          | 1                | 0              | 2.352611                | 2.065814  | -1.802175 |
| 21                          | 1                | 0              | 0.489341                | 3.610732  | -1.340087 |
| 22                          | 1                | 0              | -0.176965               | 3.128907  | 1.199149  |
| 23                          | 1                | 0              | -1.015616               | 0.972200  | 1.775110  |
| 24                          | 1                | 0              | -1.931836               | 2.402916  | -0.876594 |
| 25                          | 1                | 0              | -3.664748               | -3.026620 | -1.006904 |
| 26                          | 1                | 0              | 1.394065                | -1.085081 | 2.568680  |
| 27                          | 1                | 0              | 0.330178                | -1.553478 | 1.228074  |
| 28                          | 1                | 0              | 3.938734                | -1.476804 | -1.157826 |
| 29                          | 1                | 0              | -4.230296               | -0.309913 | 0.874244  |
| 30                          | 1                | 0              | -3.199069               | 1.202888  | 1.214827  |
| Rotational constants (GHZ): |                  |                | 0.5471475               | 0.3524533 | 0.2510411 |

T = 298.15 K

|                                              |                             |
|----------------------------------------------|-----------------------------|
| Zero-point correction=                       | 0.229637 (Hartree/Particle) |
| Thermal correction to Energy=                | 0.245872                    |
| Thermal correction to Enthalpy=              | 0.246816                    |
| Thermal correction to Gibbs Free Energy=     | 0.184236                    |
| Sum of electronic and zero-point Energies=   | -915.628939                 |
| Sum of electronic and thermal Energies=      | -915.612705                 |
| Sum of electronic and thermal Enthalpies=    | -915.611761                 |
| Sum of electronic and thermal Free Energies= | -915.674340                 |

**Table S23.** NMR isotropic and chemical shifts for **iii-4** (in ppm) (SCRF-mPW1PW91/6-311+G(2d,p)//B3LYP/6-31+G(d,p), SCRF = IEFPCM, solvent = DMSO)

| Atom | Isotropic | Scaled   |
|------|-----------|----------|
| H19  | 28.3923   | 3.146881 |
| H20  | 24.5545   | 6.774291 |
| H21  | 25.3294   | 6.041871 |
| H22  | 26.7933   | 4.658223 |
| H23  | 27.1145   | 4.354631 |
| H24  | 30.2635   | 1.378261 |
| H25  | 25.4984   | 5.882136 |
| H26  | 29.2007   | 2.382798 |
| H27  | 29.233    | 2.352268 |
| H28  | 26.2742   | 5.148866 |
| H29  | 25.6456   | 5.743006 |
| H30  | 25.7435   | 5.650473 |
|      |           |          |
| C1   | 143.6425  | 40.59728 |
| C2   | 43.6744   | 135.8413 |
| C3   | 58.6325   | 121.59   |
| C4   | 39.986    | 139.3554 |
| C5   | 111.1223  | 71.5807  |
| C6   | 100.55    | 81.65339 |
| C9   | 148.6383  | 35.83756 |
| C10  | -23.0727  | 199.4342 |
| C11  | 35.1724   | 143.9415 |
| C15  | 26.3809   | 152.3175 |
| C16  | 15.8986   | 162.3045 |
| C17  | 76.1433   | 104.9067 |

**Table S24.** Coordinates of **iii-6** (gas phase, B3LYP/6-31+G(d,p))

| Center<br>Number            | Atomic<br>Number | Atomic<br>Type | Coordinates (Angstroms) |           |           |
|-----------------------------|------------------|----------------|-------------------------|-----------|-----------|
|                             |                  |                | X                       | Y         | Z         |
| 1                           | 6                | 0              | -1.208269               | 0.175730  | -1.111922 |
| 2                           | 6                | 0              | -1.854839               | 0.799849  | 0.114905  |
| 3                           | 6                | 0              | -1.378119               | 2.075783  | 0.589893  |
| 4                           | 6                | 0              | -0.242145               | 2.601317  | 0.084727  |
| 5                           | 6                | 0              | 0.605006                | 1.928045  | -0.975496 |
| 6                           | 6                | 0              | 0.305128                | 0.412217  | -1.106713 |
| 7                           | 8                | 0              | 1.987064                | 2.163814  | -0.770131 |
| 8                           | 8                | 0              | 4.000997                | -1.644544 | 0.996569  |
| 9                           | 6                | 0              | -1.718778               | -1.282021 | -1.131286 |
| 10                          | 6                | 0              | -2.855129               | -1.291008 | -0.115974 |
| 11                          | 6                | 0              | -2.822443               | -0.014858 | 0.607064  |
| 12                          | 8                | 0              | -3.650589               | -2.191725 | 0.128626  |
| 13                          | 8                | 0              | -3.662266               | 0.210083  | 1.638598  |
| 14                          | 8                | 0              | 0.897500                | -0.253890 | 0.029913  |
| 15                          | 6                | 0              | 1.984803                | -1.057103 | -0.131069 |
| 16                          | 6                | 0              | 3.094283                | -0.665874 | 0.797888  |
| 17                          | 6                | 0              | 2.103047                | -2.067133 | -1.004029 |
| 18                          | 8                | 0              | 3.187752                | 0.432588  | 1.314034  |
| 19                          | 1                | 0              | -1.584376               | 0.702349  | -2.002342 |
| 20                          | 1                | 0              | -1.925666               | 2.583224  | 1.378973  |
| 21                          | 1                | 0              | 0.137067                | 3.555424  | 0.441941  |
| 22                          | 1                | 0              | 0.381960                | 2.387094  | -1.949743 |
| 23                          | 1                | 0              | 0.774313                | 0.031482  | -2.019850 |
| 24                          | 1                | 0              | 2.254736                | 1.756869  | 0.075106  |
| 25                          | 1                | 0              | 4.700987                | -1.276043 | 1.561837  |
| 26                          | 1                | 0              | -2.059935               | -1.626156 | -2.111988 |
| 27                          | 1                | 0              | -0.951519               | -1.979681 | -0.776355 |
| 28                          | 1                | 0              | -4.211613               | -0.589262 | 1.732982  |
| 29                          | 1                | 0              | 3.013673                | -2.650351 | -1.037285 |
| 30                          | 1                | 0              | 1.311432                | -2.315214 | -1.702079 |
| Rotational constants (GHZ): |                  |                | 0.6677333               | 0.2917002 | 0.2441766 |

T = 298.15 K

|                                              |                             |
|----------------------------------------------|-----------------------------|
| Zero-point correction=                       | 0.230147 (Hartree/Particle) |
| Thermal correction to Energy=                | 0.246015                    |
| Thermal correction to Enthalpy=              | 0.246959                    |
| Thermal correction to Gibbs Free Energy=     | 0.186320                    |
| Sum of electronic and zero-point Energies=   | -915.631273                 |
| Sum of electronic and thermal Energies=      | -915.615405                 |
| Sum of electronic and thermal Enthalpies=    | -915.614461                 |
| Sum of electronic and thermal Free Energies= | -915.675100                 |

**Table S25.** NMR isotropic and chemical shifts for **iii-6** (in ppm) (SCRF-mPW1PW91/6-311+G(2d,p)//B3LYP/6-31+G(d,p), SCRF = IEFPCM, solvent = DMSO)

| Atom | Isotropic | Scaled   |
|------|-----------|----------|
| H19  | 28.316    | 3.218998 |
| H20  | 24.5495   | 6.779017 |
| H21  | 25.2293   | 6.136484 |
| H22  | 27.0599   | 4.406238 |
| H23  | 27.2526   | 4.224102 |
| H24  | 27.7114   | 3.790454 |
| H25  | 25.2274   | 6.13828  |
| H26  | 28.9542   | 2.615784 |
| H27  | 29.2048   | 2.378922 |
| H28  | 26.3206   | 5.105009 |
| H29  | 25.4755   | 5.903781 |
| H30  | 25.9752   | 5.431474 |
|      |           |          |
| C1   | 144.0949  | 40.16625 |
| C2   | 42.4347   | 137.0224 |
| C3   | 59.5965   | 120.6716 |
| C4   | 37.4882   | 141.7351 |
| C5   | 111.8583  | 70.87948 |
| C6   | 94.6197   | 87.30345 |
| C9   | 147.4434  | 36.97599 |
| C10  | -22.357   | 198.7523 |
| C11  | 35.8627   | 143.2838 |
| C15  | 24.8086   | 153.8155 |
| C16  | 12.1107   | 165.9134 |
| C17  | 69.96     | 110.7978 |



**Table S26.** Coordinates of **iii-7** (gas phase, B3LYP/6-31+G(d,p))

| Center<br>Number | Atomic<br>Number | Atomic<br>Type | Coordinates (Angstroms) |           |           |
|------------------|------------------|----------------|-------------------------|-----------|-----------|
|                  |                  |                | X                       | Y         | Z         |
| 1                | 6                | 0              | -1.174615               | 0.200544  | -1.113405 |
| 2                | 6                | 0              | -1.840939               | 0.784033  | 0.122822  |
| 3                | 6                | 0              | -1.416714               | 2.073792  | 0.610073  |
| 4                | 6                | 0              | -0.304541               | 2.651657  | 0.109799  |
| 5                | 6                | 0              | 0.573432                | 2.022462  | -0.951230 |
| 6                | 6                | 0              | 0.328437                | 0.499042  | -1.115881 |
| 7                | 8                | 0              | 1.947854                | 2.291711  | -0.712492 |
| 8                | 8                | 0              | 3.052205                | 0.242737  | 1.480268  |
| 9                | 6                | 0              | -1.627735               | -1.276829 | -1.146913 |
| 10               | 6                | 0              | -2.763947               | -1.339297 | -0.133794 |
| 11               | 6                | 0              | -2.776065               | -0.071787 | 0.607102  |
| 12               | 8                | 0              | -3.528295               | -2.269057 | 0.097970  |
| 13               | 8                | 0              | -3.621693               | 0.108986  | 1.641560  |
| 14               | 8                | 0              | 0.974992                | -0.149332 | -0.001317 |
| 15               | 6                | 0              | 1.984225                | -1.041345 | -0.210784 |
| 16               | 6                | 0              | 3.088542                | -0.932346 | 0.799545  |
| 17               | 6                | 0              | 2.075145                | -1.954690 | -1.187393 |
| 18               | 8                | 0              | 3.944454                | -1.770353 | 0.984646  |
| 19               | 1                | 0              | -1.577512               | 0.720930  | -1.996029 |
| 20               | 1                | 0              | -1.986753               | 2.552213  | 1.401415  |
| 21               | 1                | 0              | 0.031334                | 3.619855  | 0.472464  |
| 22               | 1                | 0              | 0.359231                | 2.496347  | -1.919373 |
| 23               | 1                | 0              | 0.803305                | 0.162795  | -2.042647 |
| 24               | 1                | 0              | 2.203072                | 1.835894  | 0.106855  |
| 25               | 1                | 0              | 3.810385                | 0.235799  | 2.089152  |
| 26               | 1                | 0              | -1.953627               | -1.624968 | -2.131340 |
| 27               | 1                | 0              | -0.835952               | -1.949175 | -0.797545 |
| 28               | 1                | 0              | -4.142947               | -0.710243 | 1.725518  |
| 29               | 1                | 0              | 2.943477                | -2.599896 | -1.219422 |
| 30               | 1                | 0              | 1.318504                | -2.068504 | -1.953773 |

Rotational constants (GHZ):      0.6338013      0.3002116      0.2487605

T = 298.15 K

|                                              |                             |
|----------------------------------------------|-----------------------------|
| Zero-point correction=                       | 0.230009 (Hartree/Particle) |
| Thermal correction to Energy=                | 0.246011                    |
| Thermal correction to Enthalpy=              | 0.246955                    |
| Thermal correction to Gibbs Free Energy=     | 0.185596                    |
| Sum of electronic and zero-point Energies=   | -915.629864                 |
| Sum of electronic and thermal Energies=      | -915.613862                 |
| Sum of electronic and thermal Enthalpies=    | -915.612918                 |
| Sum of electronic and thermal Free Energies= | -915.674277                 |

**Table S27.** NMR isotropic and chemical shifts for **iii-7** (in ppm) (SCRF-mPW1PW91/6-311+G(2d,p)//B3LYP/6-31+G(d,p), SCRF = IEFPCM, solvent = DMSO)

| Atom | Isotropic | Scaled   |
|------|-----------|----------|
| H19  | 28.2622   | 3.269849 |
| H20  | 24.5189   | 6.80794  |
| H21  | 25.2423   | 6.124197 |
| H22  | 27.0135   | 4.450095 |
| H23  | 27.1074   | 4.361342 |
| H24  | 28.8625   | 2.702457 |
| H25  | 25.1915   | 6.172212 |
| H26  | 28.9484   | 2.621267 |
| H27  | 29.2749   | 2.312665 |
| H28  | 26.2956   | 5.128639 |
| H29  | 25.6221   | 5.765217 |
| H30  | 26.3391   | 5.087524 |
|      |           |          |
| C1   | 144.1502  | 40.11357 |
| C2   | 43.1124   | 136.3767 |
| C3   | 59.1485   | 121.0984 |
| C4   | 38.511    | 140.7607 |
| C5   | 112.5683  | 70.20303 |
| C6   | 97.9169   | 84.16206 |
| C9   | 147.348   | 37.06688 |
| C10  | -22.2907  | 198.6891 |
| C11  | 35.5611   | 143.5712 |
| C15  | 24.2775   | 154.3216 |
| C16  | 15.0074   | 163.1536 |
| C17  | 75.6209   | 105.4044 |

**Table S28.** Coordinates of **iii-10** (gas phase, B3LYP/6-31+G(d,p))

| Center<br>Number | Atomic<br>Number | Atomic<br>Type | Coordinates (Angstroms) |           |           |
|------------------|------------------|----------------|-------------------------|-----------|-----------|
|                  |                  |                | X                       | Y         | Z         |
| 1                | 6                | 0              | -1.148888               | 0.345123  | -1.133562 |
| 2                | 6                | 0              | -1.793517               | 0.752820  | 0.181842  |
| 3                | 6                | 0              | -1.356140               | 1.963029  | 0.836318  |
| 4                | 6                | 0              | -0.256773               | 2.612756  | 0.400079  |
| 5                | 6                | 0              | 0.561440                | 2.155156  | -0.783497 |
| 6                | 6                | 0              | 0.352959                | 0.652284  | -1.101802 |
| 7                | 8                | 0              | 1.923388                | 2.458361  | -0.496142 |
| 8                | 8                | 0              | 2.551241                | -0.376373 | 1.968109  |
| 9                | 6                | 0              | -1.582332               | -1.121006 | -1.355078 |
| 10               | 6                | 0              | -2.687748               | -1.338452 | -0.328867 |
| 11               | 6                | 0              | -2.702384               | -0.175668 | 0.572615  |
| 12               | 8                | 0              | -3.429553               | -2.303880 | -0.199434 |
| 13               | 8                | 0              | -3.519737               | -0.148316 | 1.641761  |
| 14               | 8                | 0              | 0.980850                | -0.123196 | -0.068731 |
| 15               | 6                | 0              | 2.071123                | -0.914061 | -0.334213 |
| 16               | 6                | 0              | 2.924489                | -1.106088 | 0.901568  |
| 17               | 6                | 0              | 2.395951                | -1.500441 | -1.492005 |
| 18               | 8                | 0              | 3.871784                | -1.856880 | 0.935528  |
| 19               | 1                | 0              | -1.567722               | 0.972665  | -1.934777 |
| 20               | 1                | 0              | -1.900458               | 2.318274  | 1.706421  |
| 21               | 1                | 0              | 0.101085                | 3.510242  | 0.896341  |
| 22               | 1                | 0              | 0.236846                | 2.718815  | -1.675659 |
| 23               | 1                | 0              | 0.820554                | 0.419088  | -2.063202 |
| 24               | 1                | 0              | 2.454399                | 2.384043  | -1.300483 |
| 25               | 1                | 0              | 1.791903                | 0.180982  | 1.718272  |
| 26               | 1                | 0              | -1.936073               | -1.334978 | -2.367708 |
| 27               | 1                | 0              | -0.768739               | -1.820763 | -1.130445 |
| 28               | 1                | 0              | -4.023245               | -0.983045 | 1.636695  |
| 29               | 1                | 0              | 3.294054                | -2.103913 | -1.519558 |
| 30               | 1                | 0              | 1.804541                | -1.411851 | -2.395007 |

Rotational constants (GHZ):      0.5990472      0.3083052      0.2610168

T = 298.15 K

|                                              |                             |
|----------------------------------------------|-----------------------------|
| Zero-point correction=                       | 0.229290 (Hartree/Particle) |
| Thermal correction to Energy=                | 0.245638                    |
| Thermal correction to Enthalpy=              | 0.246582                    |
| Thermal correction to Gibbs Free Energy=     | 0.182825                    |
| Sum of electronic and zero-point Energies=   | -915.625504                 |
| Sum of electronic and thermal Energies=      | -915.609157                 |
| Sum of electronic and thermal Enthalpies=    | -915.608212                 |
| Sum of electronic and thermal Free Energies= | -915.671969                 |

**Table S29.** NMR isotropic and chemical shifts for **iii-10** (in ppm) (SCRF-mPW1PW91/6-311+G(2d,p)//B3LYP/6-31+G(d,p), SCRF = IEFPCM, solvent = DMSO)

| Atom | Isotropic | Scaled   |
|------|-----------|----------|
| H19  | 28.2587   | 3.273157 |
| H20  | 24.4849   | 6.840076 |
| H21  | 25.2418   | 6.124669 |
| H22  | 26.5447   | 4.893195 |
| H23  | 26.9619   | 4.498866 |
| H24  | 30.5065   | 1.148582 |
| H25  | 22.9137   | 8.325142 |
| H26  | 29.0451   | 2.529868 |
| H27  | 29.3808   | 2.212571 |
| H28  | 26.291    | 5.132987 |
| H29  | 25.7428   | 5.651134 |
| H30  | 26.467    | 4.966635 |
|      |           |          |
| C1   | 145.2812  | 39.03601 |
| C2   | 43.8303   | 135.6927 |
| C3   | 58.7898   | 121.4402 |
| C4   | 41.6336   | 137.7856 |
| C5   | 111.7493  | 70.98333 |
| C6   | 103.0207  | 79.29945 |
| C9   | 148.1021  | 36.34842 |
| C10  | -22.3469  | 198.7427 |
| C11  | 35.0439   | 144.0639 |
| C15  | 26.0929   | 152.5919 |
| C16  | 17.2843   | 160.9843 |
| C17  | 83.0224   | 98.35271 |

**Table S30.** Coordinates of **iii-11** (gas phase, B3LYP/6-31+G(d,p))

| Center<br>Number | Atomic<br>Number | Atomic<br>Type | Coordinates (Angstroms) |           |           |
|------------------|------------------|----------------|-------------------------|-----------|-----------|
|                  |                  |                | X                       | Y         | Z         |
| 1                | 6                | 0              | -0.968917               | 0.040773  | -1.084847 |
| 2                | 6                | 0              | -1.905142               | 0.716279  | -0.095179 |
| 3                | 6                | 0              | -1.678149               | 2.099566  | 0.251438  |
| 4                | 6                | 0              | -0.533032               | 2.709408  | -0.123105 |
| 5                | 6                | 0              | 0.566077                | 2.015675  | -0.899363 |
| 6                | 6                | 0              | 0.475831                | 0.473631  | -0.818057 |
| 7                | 8                | 0              | 1.859966                | 2.488232  | -0.530157 |
| 8                | 8                | 0              | 4.134525                | -1.370069 | 0.248820  |
| 9                | 6                | 0              | -1.298843               | -1.465588 | -0.993225 |
| 10               | 6                | 0              | -2.567507               | -1.517491 | -0.155836 |
| 11               | 6                | 0              | -2.829137               | -0.165265 | 0.360952  |
| 12               | 8                | 0              | -3.271883               | -2.484760 | 0.112996  |
| 13               | 8                | 0              | -3.855718               | 0.052894  | 1.207399  |
| 14               | 8                | 0              | 0.815580                | 0.028333  | 0.517649  |
| 15               | 6                | 0              | 2.095973                | -0.305312 | 0.852538  |
| 16               | 6                | 0              | 2.820043                | -1.260820 | -0.048744 |
| 17               | 6                | 0              | 2.600991                | 0.066522  | 2.039081  |
| 18               | 8                | 0              | 2.296009                | -1.895355 | -0.943809 |
| 19               | 1                | 0              | -1.208105               | 0.407431  | -2.094190 |
| 20               | 1                | 0              | -2.424555               | 2.627806  | 0.838151  |
| 21               | 1                | 0              | -0.346969               | 3.750666  | 0.128823  |
| 22               | 1                | 0              | 0.479163                | 2.285588  | -1.961453 |
| 23               | 1                | 0              | 1.161218                | 0.027367  | -1.539753 |
| 24               | 1                | 0              | 2.001401                | 2.302223  | 0.408831  |
| 25               | 1                | 0              | 4.504995                | -2.038997 | -0.351559 |
| 26               | 1                | 0              | -1.450353               | -1.943562 | -1.965428 |
| 27               | 1                | 0              | -0.505875               | -2.018380 | -0.478424 |
| 28               | 1                | 0              | -4.300417               | -0.806100 | 1.331181  |
| 29               | 1                | 0              | 3.575348                | -0.279356 | 2.355825  |
| 30               | 1                | 0              | 2.017199                | 0.686853  | 2.710891  |

Rotational constants (GHZ):      0.6426682      0.3137088      0.2488655

T = 298.15 K

|                                              |                             |
|----------------------------------------------|-----------------------------|
| Zero-point correction=                       | 0.229540 (Hartree/Particle) |
| Thermal correction to Energy=                | 0.245746                    |
| Thermal correction to Enthalpy=              | 0.246690                    |
| Thermal correction to Gibbs Free Energy=     | 0.184631                    |
| Sum of electronic and zero-point Energies=   | -915.628960                 |
| Sum of electronic and thermal Energies=      | -915.612755                 |
| Sum of electronic and thermal Enthalpies=    | -915.611811                 |
| Sum of electronic and thermal Free Energies= | -915.673869                 |

**Table S31.** NMR isotropic and chemical shifts for **iii-11** (in ppm) (SCRF-mPW1PW91/6-311+G(2d,p)//B3LYP/6-31+G(d,p), SCRF = IEFPCM, solvent = DMSO)

| Atom | Isotropic | Scaled   |
|------|-----------|----------|
| H19  | 28.471    | 3.072495 |
| H20  | 24.5698   | 6.75983  |
| H21  | 25.1375   | 6.223251 |
| H22  | 26.9666   | 4.494423 |
| H23  | 26.4892   | 4.945652 |
| H24  | 30.3682   | 1.279301 |
| H25  | 25.3637   | 6.009452 |
| H26  | 29.1233   | 2.455955 |
| H27  | 28.9341   | 2.634783 |
| H28  | 26.2621   | 5.160302 |
| H29  | 25.7444   | 5.649622 |
| H30  | 25.9636   | 5.442439 |
|      |           |          |
| C1   | 144.7054  | 39.5846  |
| C2   | 42.7462   | 136.7256 |
| C3   | 59.1073   | 121.1377 |
| C4   | 39.9418   | 139.3975 |
| C5   | 108.9093  | 73.68912 |
| C6   | 105.7612  | 76.68845 |
| C9   | 148.8386  | 35.64672 |
| C10  | -23.2692  | 199.6214 |
| C11  | 34.7359   | 144.3574 |
| C15  | 27.7042   | 151.0568 |
| C16  | 16.1796   | 162.0368 |
| C17  | 70.2163   | 110.5536 |

**Table S32.** Coordinates of **i-1** (wB97XD/6-311++G(d,p), SCRF = CPCM, solvent = MeOH)

| Center<br>Number            | Atomic<br>Number | Atomic<br>Type | Coordinates (Angstroms) |           |           |
|-----------------------------|------------------|----------------|-------------------------|-----------|-----------|
|                             |                  |                | X                       | Y         | Z         |
| 1                           | 6                | 0              | -1.032106               | 0.722883  | -0.913466 |
| 2                           | 6                | 0              | -1.675367               | 0.525392  | 0.436641  |
| 3                           | 6                | 0              | -1.330545               | 1.433213  | 1.510277  |
| 4                           | 6                | 0              | -0.270981               | 2.241793  | 1.386353  |
| 5                           | 6                | 0              | 0.634305                | 2.256590  | 0.176433  |
| 6                           | 6                | 0              | 0.446323                | 1.029104  | -0.728047 |
| 7                           | 8                | 0              | 0.396800                | 3.388236  | -0.655456 |
| 8                           | 8                | 0              | 1.679899                | -2.290653 | 1.013804  |
| 9                           | 6                | 0              | -1.386786               | -0.535265 | -1.716338 |
| 10                          | 6                | 0              | -2.407704               | -1.247185 | -0.858705 |
| 11                          | 6                | 0              | -2.480735               | -0.550572 | 0.435263  |
| 12                          | 8                | 0              | -3.055765               | -2.240962 | -1.125049 |
| 13                          | 8                | 0              | -3.251199               | -1.015213 | 1.429484  |
| 14                          | 8                | 0              | 1.032725                | -0.116375 | -0.111788 |
| 15                          | 6                | 0              | 2.360200                | -0.362339 | -0.231122 |
| 16                          | 6                | 0              | 2.706058                | -1.664480 | 0.439797  |
| 17                          | 6                | 0              | 3.287382                | 0.375479  | -0.834066 |
| 18                          | 8                | 0              | 3.817290                | -2.125940 | 0.469633  |
| 19                          | 1                | 0              | -1.467475               | 1.610449  | -1.383559 |
| 20                          | 1                | 0              | -1.923191               | 1.429821  | 2.418601  |
| 21                          | 1                | 0              | -0.010596               | 2.925932  | 2.188254  |
| 22                          | 1                | 0              | 1.673952                | 2.269556  | 0.524868  |
| 23                          | 1                | 0              | 0.925269                | 1.210772  | -1.693543 |
| 24                          | 1                | 0              | 0.492489                | 4.186309  | -0.130402 |
| 25                          | 1                | 0              | 0.874172                | -1.767532 | 0.881003  |
| 26                          | 1                | 0              | -1.788377               | -0.328038 | -2.708880 |
| 27                          | 1                | 0              | -0.522602               | -1.195654 | -1.834519 |
| 28                          | 1                | 0              | -3.691471               | -1.814228 | 1.110461  |
| 29                          | 1                | 0              | 4.304693                | 0.010440  | -0.843174 |
| 30                          | 1                | 0              | 3.074879                | 1.321745  | -1.312259 |
| Rotational constants (GHZ): |                  |                | 0.5306313               | 0.3515647 | 0.2641050 |

T = 298.15 K

|                                              |                             |
|----------------------------------------------|-----------------------------|
| Zero-point correction=                       | 0.232023 (Hartree/Particle) |
| Thermal correction to Energy=                | 0.248310                    |
| Thermal correction to Enthalpy=              | 0.249255                    |
| Thermal correction to Gibbs Free Energy=     | 0.187142                    |
| Sum of electronic and zero-point Energies=   | -915.568029                 |
| Sum of electronic and thermal Energies=      | -915.551742                 |
| Sum of electronic and thermal Enthalpies=    | -915.550798                 |
| Sum of electronic and thermal Free Energies= | -915.612910                 |

w= 0.077318 a.u., Optical Rotation Beta= 1.5676 au.  
Molar Mass = 252.2232 grams/mole, [Alpha] ( 5893.0 A) = 240.23 deg.

**Table S33.** Coordinates of **i-2** (wB97XD/6-311++G(d,p), SCRF = CPCM, solvent = MeOH)

| Center Number               | Atomic Number | Atomic Type | Coordinates (Angstroms) |           |           |
|-----------------------------|---------------|-------------|-------------------------|-----------|-----------|
|                             |               |             | X                       | Y         | Z         |
| 1                           | 6             | 0           | -1.031508               | 0.740290  | -0.910156 |
| 2                           | 6             | 0           | -1.665347               | 0.524920  | 0.441955  |
| 3                           | 6             | 0           | -1.313614               | 1.418615  | 1.525371  |
| 4                           | 6             | 0           | -0.259000               | 2.233395  | 1.404985  |
| 5                           | 6             | 0           | 0.635450                | 2.267258  | 0.192213  |
| 6                           | 6             | 0           | 0.447457                | 1.042222  | -0.725970 |
| 7                           | 8             | 0           | 0.348343                | 3.464450  | -0.521248 |
| 8                           | 8             | 0           | 1.648161                | -2.288723 | 1.016450  |
| 9                           | 6             | 0           | -1.391733               | -0.507489 | -1.726744 |
| 10                          | 6             | 0           | -2.406389               | -1.230714 | -0.871279 |
| 11                          | 6             | 0           | -2.470480               | -0.551046 | 0.431970  |
| 12                          | 8             | 0           | -3.055563               | -2.221581 | -1.145800 |
| 13                          | 8             | 0           | -3.232932               | -1.029679 | 1.425924  |
| 14                          | 8             | 0           | 1.029337                | -0.111321 | -0.116361 |
| 15                          | 6             | 0           | 2.352595                | -0.374751 | -0.238244 |
| 16                          | 6             | 0           | 2.681845                | -1.678879 | 0.438592  |
| 17                          | 6             | 0           | 3.290718                | 0.343803  | -0.847548 |
| 18                          | 8             | 0           | 3.786839                | -2.154919 | 0.469312  |
| 19                          | 1             | 0           | -1.468802               | 1.634308  | -1.366155 |
| 20                          | 1             | 0           | -1.899962               | 1.402336  | 2.437556  |
| 21                          | 1             | 0           | 0.002768                | 2.915449  | 2.206761  |
| 22                          | 1             | 0           | 1.675159                | 2.281014  | 0.538707  |
| 23                          | 1             | 0           | 0.925692                | 1.221638  | -1.693064 |
| 24                          | 1             | 0           | 1.106986                | 3.697335  | -1.062111 |
| 25                          | 1             | 0           | 0.849384                | -1.755260 | 0.882459  |
| 26                          | 1             | 0           | -1.800284               | -0.287799 | -2.713777 |
| 27                          | 1             | 0           | -0.528192               | -1.166049 | -1.859203 |
| 28                          | 1             | 0           | -3.674419               | -1.825158 | 1.099878  |
| 29                          | 1             | 0           | 4.301433                | -0.039249 | -0.854710 |
| 30                          | 1             | 0           | 3.096782                | 1.289865  | -1.333422 |
| Rotational constants (GHZ): |               |             | 0.5269371               | 0.3536563 | 0.2648355 |

T = 298.15 K

|                                              |                             |
|----------------------------------------------|-----------------------------|
| Zero-point correction=                       | 0.232110 (Hartree/Particle) |
| Thermal correction to Energy=                | 0.248362                    |
| Thermal correction to Enthalpy=              | 0.249306                    |
| Thermal correction to Gibbs Free Energy=     | 0.187079                    |
| Sum of electronic and zero-point Energies=   | -915.568358                 |
| Sum of electronic and thermal Energies=      | -915.552106                 |
| Sum of electronic and thermal Enthalpies=    | -915.551162                 |
| Sum of electronic and thermal Free Energies= | -915.613389                 |

|              |                      |                        |             |
|--------------|----------------------|------------------------|-------------|
| w=           | 0.077318 a.u.,       | Optical Rotation Beta= | 1.1445 au.  |
| Molar Mass = | 252.2232 grams/mole, | [Alpha] ( 5893.0 A) =  | 175.39 deg. |



**Table S34.** Coordinates of **i-4** (wB97XD/6-311++G(d,p), SCRF = CPCM, solvent = MeOH)

| Center Number               | Atomic Number | Atomic Type | Coordinates (Angstroms) |           |           |
|-----------------------------|---------------|-------------|-------------------------|-----------|-----------|
|                             |               |             | X                       | Y         | Z         |
| 1                           | 6             | 0           | -1.058749               | 0.676770  | -0.910153 |
| 2                           | 6             | 0           | -1.724673               | 0.497066  | 0.430759  |
| 3                           | 6             | 0           | -1.414715               | 1.431957  | 1.491169  |
| 4                           | 6             | 0           | -0.366508               | 2.255281  | 1.368455  |
| 5                           | 6             | 0           | 0.561376                | 2.260121  | 0.176153  |
| 6                           | 6             | 0           | 0.411999                | 1.014697  | -0.712810 |
| 7                           | 8             | 0           | 0.326428                | 3.377705  | -0.677102 |
| 8                           | 8             | 0           | 1.824730                | -2.273501 | 0.959177  |
| 9                           | 6             | 0           | -1.380390               | -0.602850 | -1.692462 |
| 10                          | 6             | 0           | -2.412948               | -1.306998 | -0.843135 |
| 11                          | 6             | 0           | -2.519446               | -0.586503 | 0.434321  |
| 12                          | 8             | 0           | -3.046973               | -2.312141 | -1.103598 |
| 13                          | 8             | 0           | -3.306156               | -1.040244 | 1.422116  |
| 14                          | 8             | 0           | 1.021314                | -0.109731 | -0.087050 |
| 15                          | 6             | 0           | 2.352423                | -0.290951 | -0.212794 |
| 16                          | 6             | 0           | 2.817275                | -1.573319 | 0.412737  |
| 17                          | 6             | 0           | 3.239603                | 0.505841  | -0.809242 |
| 18                          | 8             | 0           | 3.968184                | -1.936458 | 0.421278  |
| 19                          | 1             | 0           | -1.503590               | 1.546006  | -1.405680 |
| 20                          | 1             | 0           | -2.024363               | 1.438575  | 2.388219  |
| 21                          | 1             | 0           | -0.133091               | 2.961447  | 2.159714  |
| 22                          | 1             | 0           | 1.592462                | 2.294798  | 0.547174  |
| 23                          | 1             | 0           | 0.886530                | 1.205434  | -1.679469 |
| 24                          | 1             | 0           | 0.394108                | 4.183532  | -0.159634 |
| 25                          | 1             | 0           | 2.202204                | -3.078495 | 1.337444  |
| 26                          | 1             | 0           | -1.759265               | -0.423766 | -2.699402 |
| 27                          | 1             | 0           | -0.505292               | -1.254673 | -1.770929 |
| 28                          | 1             | 0           | -3.732993               | -1.848337 | 1.107957  |
| 29                          | 1             | 0           | 4.274318                | 0.195355  | -0.832933 |
| 30                          | 1             | 0           | 2.977270                | 1.448408  | -1.269020 |
| Rotational constants (GHZ): |               |             | 0.5350182               | 0.3425626 | 0.2582968 |

T = 298.15 K

|                                              |                             |
|----------------------------------------------|-----------------------------|
| Zero-point correction=                       | 0.231908 (Hartree/Particle) |
| Thermal correction to Energy=                | 0.248264                    |
| Thermal correction to Enthalpy=              | 0.249208                    |
| Thermal correction to Gibbs Free Energy=     | 0.186632                    |
| Sum of electronic and zero-point Energies=   | -915.565458                 |
| Sum of electronic and thermal Energies=      | -915.549102                 |
| Sum of electronic and thermal Enthalpies=    | -915.548158                 |
| Sum of electronic and thermal Free Energies= | -915.610733                 |

|              |                      |                        |             |
|--------------|----------------------|------------------------|-------------|
| w=           | 0.077318 a.u.,       | Optical Rotation Beta= | 1.3605 au.  |
| Molar Mass = | 252.2232 grams/mole, | [Alpha] ( 5893.0 A) =  | 208.49 deg. |

**Table S35.** Coordinates of **i-5** (wB97XD/6-311++G(d,p), SCRF = CPCM, solvent = MeOH)

| Center<br>Number            | Atomic<br>Number | Atomic<br>Type | Coordinates (Angstroms) |           |           |
|-----------------------------|------------------|----------------|-------------------------|-----------|-----------|
|                             |                  |                | X                       | Y         | Z         |
| 1                           | 6                | 0              | -1.097959               | 0.642596  | -0.908929 |
| 2                           | 6                | 0              | -1.759277               | 0.460974  | 0.433942  |
| 3                           | 6                | 0              | -1.464678               | 1.408992  | 1.487023  |
| 4                           | 6                | 0              | -0.431322               | 2.249788  | 1.356782  |
| 5                           | 6                | 0              | 0.494891                | 2.262435  | 0.163197  |
| 6                           | 6                | 0              | 0.367076                | 1.007767  | -0.716388 |
| 7                           | 8                | 0              | 0.238934                | 3.369585  | -0.697587 |
| 8                           | 8                | 0              | 4.064025                | -1.762876 | 0.355770  |
| 9                           | 6                | 0              | -1.398872               | -0.647546 | -1.682013 |
| 10                          | 6                | 0              | -2.418550               | -1.363120 | -0.826714 |
| 11                          | 6                | 0              | -2.535704               | -0.635774 | 0.445979  |
| 12                          | 8                | 0              | -3.036301               | -2.380201 | -1.079839 |
| 13                          | 8                | 0              | -3.313822               | -1.095645 | 1.437709  |
| 14                          | 8                | 0              | 0.997376                | -0.099984 | -0.083860 |
| 15                          | 6                | 0              | 2.331254                | -0.258615 | -0.208222 |
| 16                          | 6                | 0              | 2.753344                | -1.531920 | 0.462013  |
| 17                          | 6                | 0              | 3.198725                | 0.549377  | -0.819658 |
| 18                          | 8                | 0              | 1.995574                | -2.271731 | 1.036486  |
| 19                          | 1                | 0              | -1.558291               | 1.500617  | -1.409882 |
| 20                          | 1                | 0              | -2.073185               | 1.411412  | 2.384874  |
| 21                          | 1                | 0              | -0.209633               | 2.965797  | 2.142559  |
| 22                          | 1                | 0              | 1.525653                | 2.318408  | 0.532673  |
| 23                          | 1                | 0              | 0.834868                | 1.200970  | -1.685849 |
| 24                          | 1                | 0              | 0.292176                | 4.179950  | -0.185543 |
| 25                          | 1                | 0              | 4.260911                | -2.593573 | 0.806851  |
| 26                          | 1                | 0              | -1.781997               | -0.481497 | -2.689592 |
| 27                          | 1                | 0              | -0.512947               | -1.284974 | -1.757364 |
| 28                          | 1                | 0              | -3.726843               | -1.913295 | 1.129885  |
| 29                          | 1                | 0              | 4.242652                | 0.275291  | -0.849049 |
| 30                          | 1                | 0              | 2.906786                | 1.477991  | -1.291047 |
| Rotational constants (GHZ): |                  |                | 0.5386593               | 0.3355570 | 0.2551986 |

T = 298.15 K

|                                              |                             |
|----------------------------------------------|-----------------------------|
| Zero-point correction=                       | 0.231944 (Hartree/Particle) |
| Thermal correction to Energy=                | 0.248300                    |
| Thermal correction to Enthalpy=              | 0.249245                    |
| Thermal correction to Gibbs Free Energy=     | 0.186563                    |
| Sum of electronic and zero-point Energies=   | -915.565433                 |
| Sum of electronic and thermal Energies=      | -915.549078                 |
| Sum of electronic and thermal Enthalpies=    | -915.548133                 |
| Sum of electronic and thermal Free Energies= | -915.610815                 |

w= 0.077318 a.u., Optical Rotation Beta= 1.1359 au.  
Molar Mass = 252.2232 grams/mole, [Alpha] ( 5893.0 A) = 174.07 deg.

**Table S36.** Coordinates of **i-6** (wB97XD/6-311++G(d,p), SCRF = CPCM, solvent = MeOH)

| Center Number               | Atomic Number | Atomic Type | Coordinates (Angstroms) |           |           |
|-----------------------------|---------------|-------------|-------------------------|-----------|-----------|
|                             |               |             | X                       | Y         | Z         |
| 1                           | 6             | 0           | -1.060166               | 0.699577  | -0.905534 |
| 2                           | 6             | 0           | -1.709366               | 0.493842  | 0.440225  |
| 3                           | 6             | 0           | -1.385296               | 1.406296  | 1.516206  |
| 4                           | 6             | 0           | -0.343752               | 2.237797  | 1.396554  |
| 5                           | 6             | 0           | 0.561001                | 2.274764  | 0.191606  |
| 6                           | 6             | 0           | 0.411756                | 1.032965  | -0.712871 |
| 7                           | 8             | 0           | 0.252400                | 3.458596  | -0.537422 |
| 8                           | 8             | 0           | 1.786968                | -2.271439 | 0.956576  |
| 9                           | 6             | 0           | -1.389263               | -0.566218 | -1.706985 |
| 10                          | 6             | 0           | -2.410332               | -1.287623 | -0.858312 |
| 11                          | 6             | 0           | -2.502386               | -0.590913 | 0.433132  |
| 12                          | 8             | 0           | -3.045048               | -2.289596 | -1.129340 |
| 13                          | 8             | 0           | -3.274278               | -1.065787 | 1.422961  |
| 14                          | 8             | 0           | 1.016542                | -0.100391 | -0.095127 |
| 15                          | 6             | 0           | 2.343738                | -0.301080 | -0.223562 |
| 16                          | 6             | 0           | 2.789765                | -1.588042 | 0.407799  |
| 17                          | 6             | 0           | 3.244254                | 0.475629  | -0.826184 |
| 18                          | 8             | 0           | 3.935188                | -1.968020 | 0.417978  |
| 19                          | 1             | 0           | -1.509903               | 1.577717  | -1.380467 |
| 20                          | 1             | 0           | -1.981169               | 1.390999  | 2.422297  |
| 21                          | 1             | 0           | -0.102960               | 2.934287  | 2.192629  |
| 22                          | 1             | 0           | 1.596286                | 2.318691  | 0.548500  |
| 23                          | 1             | 0           | 0.884677                | 1.222260  | -1.681577 |
| 24                          | 1             | 0           | 1.006876                | 3.698526  | -1.080913 |
| 25                          | 1             | 0           | 2.152662                | -3.080452 | 1.337844  |
| 26                          | 1             | 0           | -1.780002               | -0.370353 | -2.706249 |
| 27                          | 1             | 0           | -0.513858               | -1.214809 | -1.806769 |
| 28                          | 1             | 0           | -3.701890               | -1.869904 | 1.099839  |
| 29                          | 1             | 0           | 4.272881                | 0.145389  | -0.847905 |
| 30                          | 1             | 0           | 3.002502                | 1.418786  | -1.294688 |
| Rotational constants (GHZ): |               |             | 0.5307394               | 0.3453603 | 0.2596353 |

T = 298.15 K

|                                              |                             |
|----------------------------------------------|-----------------------------|
| Zero-point correction=                       | 0.232050 (Hartree/Particle) |
| Thermal correction to Energy=                | 0.248329                    |
| Thermal correction to Enthalpy=              | 0.249273                    |
| Thermal correction to Gibbs Free Energy=     | 0.186855                    |
| Sum of electronic and zero-point Energies=   | -915.565648                 |
| Sum of electronic and thermal Energies=      | -915.549369                 |
| Sum of electronic and thermal Enthalpies=    | -915.548425                 |
| Sum of electronic and thermal Free Energies= | -915.610843                 |

w= 0.077318 a.u., Optical Rotation Beta= 0.9360 au.  
Molar Mass = 252.2232 grams/mole, [Alpha] ( 5893.0 A) = 143.43 deg.

## References

1. Wang, M.; Carver, J. J.; Phelan, V. V.; Sanchez, L. M.; Garg, N.; Peng, Y.; Nguyen, D. D.; Watrous, J.; Kaponov, C. A.; Luzzatto-Knaan, T.; Porto, C.; Bouslimani, A.; Melnik, A. V.; Meehan, M. J.; Liu, W.-T.; Crüsemann, Boudreau, P. D.; Esquenazi, E.; Sandoval-Calderón, Kersten, R. D.; Pace, L. A.; Quinn, R. A.; Duncan, K. R.; Hsu, C.-C.; Floros, D. J.; Gavilan, R. G.; Kleigrew, K.; Northen, T.; Dutton, R. J.; Parrot, D.; Carlson, E. E.; Aigle, B.; Michelsen, C. F.; Jelsbak, L.; Sohlenkamp, C.; Pevzner, P.; Edlund, A.; McLean, J.; Piel, J.; Murphy, B. T.; Gerwick, L.; Liaw, C.-C., Yang, Y.-L.; Humpf, H.-U.; Maansson, M.; Keyzers, R. A.; Sims, A. C.; Johnson, A. R.; Sidebottom, A. M.; Sedio, B. E.; Klitgaard, A.; Larson, C. B.; Boya P, C. A.; Torres-Mendoza, D.; Gonzalez, D. J.; Silva, D. B.; Marques, L. M.; Demarque, D. P.; Pociute, E.; O'Neill, E. C.; Briand, E.; Helfrich, E. J. N.; Granatosky, E. A.; Glukhov, E.; Ryffel, F.; Houson, H.; Mohimani, H.; Kharbush, J. J.; Zeng, Y.; Vorholt, J. A.; Kurita, K. L.; Charusanti, P.; McPhail, K. L.; Nielsen, K. F.; Vuong, L.; Elfeki, M.; Traxler, M. F.; Engene, N.; Koyama, N.; Vining, O. B.; Baric, R.; Silva, R. R.; Mascuch, S. J.; Tomasi, S.; Jenkins, S.; Macherla, V.; Hoffman, T.; Agarwal, V.; Williams, P. G.; Dai, J.; Neupane, R.; Gurr, J.; Rodriguez, A. M. C.; Lamsa, A.; Zhang, C.; Dorrestein, K.; Duggan, B. M.; Almaliti, J.; Allard, P.-M.; Phapale, P.; Nothias, L.-F.; Alexandrov, T.; Litaudon, M.; Wolfender, J.-L.; Kyle, J. E.; Metz, T. O.; Peryea, T.; Nguyen, D.-T.; VanLeer, D.; Shinn, P.; Jadhav, A.; Müller, R.; Waters, K. M.; Shi, W.; Liu, X.; Zhang, L.; Knight, R.; Jensen, P. R.; Palsson, B. Ø.; Pogliano, K.; Linington, R. G.; Gutiérrez, M.; Lopes, N. P.; Gerwick, W. H.; Moore, B. S.; Dorrestein, P. C.; Bandeira, N. *Nat. Biotechnol.* **2016**, *34*, 828.
2. Kalyuzhnaya, M. G.; Lamb, A. E.; McTaggart, T. L.; Oshkin, I. Y.; Shapiro, N.; Woyke, T.; Chistoserdova, L. *Genome Announc.* **2015**, *3*, e00103-15.
3. Puri, A. W.; Schaefer, A. L.; Fu, Y.; Beck, D. A.; Greenberg, E. P.; Lidstrom, M. E. *J. Bacteriol.* **2017**, *199*, e00773-16.
4. Whittenbury, R.; Phillips, K. C.; Wilkinson, J. F. *J. Gen. Microbiol.* **1970**, *61*, 205.
5. Puri, A. W.; Owen, S.; Chu, F.; Chavkin, T.; Beck, D. A.; Kalyuzhnaya, M. G.; Lidstrom, M. E. *Appl. Environ. Microbiol.* **2015**, *81*, 1775.
6. *Schrödinger Release 2016-1*, Schrödinger, LLC, New York, NY, 2016.
7. Harder, E.; Damm, W.; Maple, J.; Wu, C.; Reboul, M.; Xiang, J. Y.; Wang, L.; Lupyan, D.; Dahlgren, M. K.; Knight, J. L.; Kaus, J. W.; Cerutti, D. S.; Krilov, G.; Jorgensen, W. L.; Abel, R.; Friesner, R. A. *J. Chem. Theory Comput.* **2016**, *12*, 281.
8. Frisch, M. J.; Trucks, G. W.; Schlegel, H. B.; Scuseria, G. E.; Robb, M. A.; Cheeseman, J. R.; Scalmani, G.; Barone, V.; Mennucci, B.; Petersson, G. A.; Nakatsuji, H.; Caricato, M.; Li, X.; Hratchian, H. P.; Izmaylov, A. F.; Bloino, J.; Zheng, G.; Sonnenberg, J. L.; Hada, M.; Ehara, M.; Toyota, K.; Fukuda, R.; Hasegawa, J.; Ishida, M.; Nakajima, T.; Honda, Y.; Kitao, O.; Nakai, H.; Vreven, T.; Montgomery, J. A., Jr.; Peralta, J. E.; Ogliaro, F.; Bearpark, M.; Heyd, J. J.; Brothers, E.; Kudin, K. N.; Staroverov, V. N.; Keith, T.; Kobayashi, R.; Normand, J.; Raghavachari, K.; Rendell, A.; Burant, J. C.; Iyengar, S. S.; Tomasi, J.; Cossi, M.; Rega, N.; Millam, J. M.; Klene, M.; Knox, J. E.; Cross, J. B.; Bakken, V.; Adamo, C.; Jaramillo, J.; Gomperts, R.; Stratmann, R. E.; Yazyev, O.; Austin, A. J.; Cammi, R.; Pomelli, C.; Ochterski, J. W.; Martin, R. L.; Morokuma, K.; Zakrzewski, V. G.; Voth, G. A.; Salvador, P.; Dannenberg, J. J.; Dapprich, S.; Daniels, A. D.; Farkas, O.; Foresman, J. B.; Ortiz, J. V.; Cioslowski, J.; Fox, D. J. *Gaussian 09, Revision D.01*, Gaussian, Inc., Wallingford CT, 2013.

9. B3LYP: (a) Becke, A. D. *J. Chem. Phys.* **1993**, *98*, 1372; (b) Becke, A. D.; *J. Chem. Phys.* **1993**, *98*, 5648; (c) Lee, C.; Yang, W.; Parr, R. G. *Phys. Rev. B* **1998**, *37*, 785; (d) Stephens, P. J.; Devlin, F. J.; Chabalowski, C. F.; Frisch, M. J. *J. Phys. Chem.* **1994**, *98*, 11623; (e) Tirado-Rives, J.; Jorgensen, W. L. *J. Chem. Theory Comput.* **2008**, *4*, 297.
10. (a) Lodewyk, M. W.; Soldi, C.; Jones, P. B.; Olmstead, M. M.; Rita, J.; Shaw, J. T.; Tantillo, D. J. *J. Am. Chem. Soc.* **2012**, *134*, 18550; (b) Lodewyk, M. W.; Siebert, M. R.; Tantillo, D. J. *Chem. Rev.* **2012**, *112*, 1839.
11. (a) London, F. *J. Phys. Radium* **1937**, *8*, 397; (b) McWeeny, R. *Phys. Rev.* **1962**, *126*, 1028; (c) Ditchfield, R. *Mol. Phys.* **1974**, *27*, 789; (d) Wolinski, K.; Hilton, J. F.; Pulay, P. *J. Am. Chem. Soc.* **1990**, *112*, 8251; (e) Cheeseman, J. R.; Trucks, G. W.; Keith, T. A.; Frisch, M. J. *J. Chem. Phys.* **1996**, *104*, 5497.
12. mPW1PW91: Adamo, C.; Barone, V. *J. Chem. Phys.* **1998**, *108*, 664.
13. Scalmani, G.; Frisch, M. J. *J. Chem. Phys.* **2010**, *132*, 114110.
14. Pierens, G. K. *J. Comput. Chem.* **2014**, *35*, 1388.
15. Cherblanc, F.; Lo, Y.-P.; De Gussem, E.; Alcazar-Fuoli, L.; Bignell, E.; He, Y.; Chapman-Rothe, N.; Bultinck, P.; Herrebout, W. A.; Brown, R.; Rzepa, H. S.; Fuchter, M. J. *Chem. Eur. J.* **2011**, *17*, 11868.
16. Hiraki, M.; Hwang, S.-Y.; Cao, S.; Ramadhar, T. R.; Byun, S.; Yoon, K. Y.; Lee, J. H.; Chu, K.; Gurkar, A. U.; Kolev, V.; Zhang, J.; Namba, T.; Murphy, M. E.; Newman, D. J.; Mandinova, A.; Clardy, J.; Lee, S. W. *Chem. Biol.* **2015**, *22*, 1206.
17. wB97XD: Chai, J.-D.; Head-Gordon, M. *Phys. Chem. Chem. Phys.* **2008**, *10*, 6615.
18. (a) Barone, V.; Cossi, M. *J. Phys. Chem. A* **1998**, *102*, 1995; (b) Cossi, M.; Rega, N.; Scalmani, G.; Barone, V. *J. Comp. Chem.* **2003**, *24*, 669.
